# Supplementary material for: Boiling, critical, and freezing temperatures in light of molecular descriptors: correlation and causation
Source: Royal Society of Chemistry journal article supplement (doi:10.1039/d3cp04788a), 2023-12-11
Supplement: d3cp04788a1.pdf [file d3cp04788a1.pdf]

## Supplementary Materials

# Boiling, Critical and Freezing Temperatures in Light of Molecular Descriptors: Correlation and Causation

Ossama Abdeen, Mohamed Ismael\*, Aly Abdou\*

Chemistry Department, Faculty of Science, Sohag University, Sohag, 82524, Egypt

Corresponding authors:

Mohamed Ismael (m\_ismael@science.sohag.edu.eg)

Aly Abdou (aly\_abdou@science.sohag.edu.eg)

## Supplementary Tables

**Table S1\*:**

The available experimental normal boiling points (NBPs), critical temperatures (CTs) and normal freezing points (NFPs) in Kelvins of 169 compounds tabulated against molecular surface descriptors as defined in Methodology section.

| Fluid             | Group | NBP    | CT     | NFT    | $A$   | $\Gamma_s$ | $P_{av}$ | $L_{av}$ | $\Gamma_m$ | $\sigma_{r,ep}$ | $S$ | $g$ | $g'$ |
|-------------------|-------|--------|--------|--------|-------|------------|----------|----------|------------|-----------------|-----|-----|------|
| He                | I     | 4.22   | 5.20   |        | 22.8  | 0          | 0.91     | 20.3     | 0          | 0               | 0   | 0   | -    |
| Ne                | I     | 27.10  | 44.40  | 24.56  | 29.1  | 0          | 1.18     | 1.3      | 0          | 0               | 0   | 0   | -    |
| Ar                | I     | 87.50  | 150.86 | 83.80  | 49.9  | 0          | 2.90     | 5.2      | 0          | 0               | 0   | 0   | -    |
| Kr                | I     | 119.73 | 209.48 | 115.78 | 57.8  | 0          | 3.80     | 7.5      | 0          | 0               | 0   | 0   | -    |
| Xe                | I     | 165.05 | 289.73 | 161.40 | 70.1  | 0          | 5.27     | 12.7     | 0          | 0               | 0   | 0   | -    |
| H <sub>2</sub>    | I     | 20.37  | 33.18  | 13.99  | 32.4  | 2,850      | 2.02     | 28.9     | 108        | 0.89            | 0   | 1   | -    |
| N <sub>2</sub>    | I     | 77.40  | 126.19 | 63.30  | 54.4  | 6,923      | 3.02     | 8.5      | 79         | 0.84            | 0   | 1   | -    |
| CO                | I     | 81.63  | 134.45 | 68.05  | 55.0  | 41,752     | 3.14     | 13.1     | 419        | 2.69            | 0   | 1   | -    |
| F <sub>2</sub>    | I     | 85.20  | 144.00 | 55.20  | 47.0  | 4,290      | 2.14     | 2.5      | 111        | 0.78            | 0   | 1   | -    |
| O <sub>2</sub>    | I     | 90.20  | 154.58 | 54.80  | 50.3  | 0          | 2.60     | 3.8      | 5          | 0               | 1   | 1   | -    |
| NO                | I     | 121.41 | 180.30 | 109.55 | 52.0  | 15,711     | 2.78     | 6.6      | 255        | 1.91            | 1   | 1   | -    |
| FCI               | I     | 173.10 |        | 117.60 | 64.2  | 56,075     | 3.66     | 7.4      | 937        | 3.01            | 0   | 1   | -    |
| HCl               | I     | 188.00 | 324.70 | 158.98 | 58.0  | 99,315     | 3.84     | 8.6      | 1,387      | 3.08            | 0   | 1   | -    |
| HBr               | I     | 206.77 | 363.20 | 186.35 | 65.2  | 89,370     | 4.73     | 11.2     | 956        | 2.62            | 0   | 1   | -    |
| HI                | I     | 237.60 | 424.00 | 222.39 | 77.0  | 83,420     | 6.20     | 17.1     | 607        | 2.14            | 0   | 1   | -    |
| Cl <sub>2</sub>   | I     | 239.50 | 416.96 | 171.65 | 80.6  | 38,474     | 5.26     | 9.8      | 390        | 1.35            | 0   | 1   | -    |
| ClBr              | I     | 278.15 |        | 207.15 | 86.9  | 58,434     | 6.01     | 11.7     | 614        | 2.16            | 0   | 1   | -    |
| HF                | I     | 292.70 | 461.00 | 190.00 | 36.5  | 180,771    | 1.83     | 2.8      | 5,012      | 6.39            | 0   | 1   | -    |
| Br <sub>2</sub>   | I     | 331.95 | 588.15 | 201.15 | 93.2  | 69,578     | 6.78     | 13.2     | 583        | 1.59            | 0   | 1   | -    |
| ClI               | I     | 370.15 |        | 300.53 | 97.5  | 105,151    | 7.28     | 16.7     | 863        | 3.51            | 0   | 1   | -    |
| IBr               | I     | 389.15 |        | 313.15 | 103.7 | 97,744     | 8.07     | 17.8     | 734        | 2.33            | 0   | 1   | -    |
| OF <sub>2</sub>   | I     | 127.90 |        | 49.40  | 61.4  | 18,500     | 2.88     | 3.7      | 235        | 1.54            | 0   | 2   | -    |
| O <sub>3</sub>    | I     | 161.30 | 261.15 | 80.70  | 64.4  | 58,205     | 3.40     | 4.9      | 587        | 3.28            | 0   | 2   | -    |
| N <sub>2</sub> O  | I     | 184.68 | 309.56 | 182.35 | 66.8  | 85,470     | 3.66     | 6.1      | 648        | 3.60            | 0   | 2   | -    |
| CO <sub>2</sub>   | I     | 194.69 | 304.18 |        | 64.6  | 169,433    | 3.40     | 4.6      | 1,391      | 3.76            | 0   | 1   | -    |
| SH <sub>2</sub>   | I     | 212.87 | 373.30 | 190.85 | 66.1  | 134,393    | 4.73     | 13.5     | 1,013      | 4.24            | 0   | 2   | -    |
| FNO               | I     | 213.25 |        |        | 64.6  | 371,518    | 3.25     | 5.5      | 2,457      | 6.11            | 0   | 2   | -    |
| SOC               | I     | 222.95 | 378.80 | 134.35 | 83.4  | 86,094     | 5.34     | 10.6     | 553        | 4.17            | 0   | 1   | -    |
| FCN               | I     | 227.15 |        | 191.15 | 66.8  | 312,246    | 3.65     | 6.4      | 2,091      | 5.71            | 0   | 1   | -    |
| H <sub>2</sub> Se | I     | 231.90 | 411.00 | 207.42 | 72.0  | 111,189    | 5.50     | 16.2     | 722        | 3.76            | 0   | 2   | -    |
| OCS <sub>e</sub>  | I     | 251.45 | 394.25 | 148.75 | 88.7  | 90,120     | 6.00     | 12.6     | 636        | 3.60            | 0   | 1   | -    |
| SO <sub>2</sub>   | I     | 263.14 | 430.34 | 200.75 | 75.8  | 456,769    | 4.37     | 9.0      | 2,493      | 5.28            | 0   | 2   | -    |
| ClNO              | I     | 267.35 | 440.65 | 210.65 | 83.6  | 401,496    | 5.01     | 9.4      | 1,598      | 3.91            | 0   | 2   | -    |
| Cl <sub>2</sub> O | I     | 275.35 |        | 152.55 | 93.4  | 67,131     | 5.90     | 11.4     | 588        | 2.70            | 0   | 2   | -    |
| ClO <sub>2</sub>  | I     | 284.15 | 465.00 | 214.15 | 75.0  | 361,329    | 4.23     | 6.3      | 1,921      | 4.31            | 1   | 2   | -    |
| ClCN              | I     | 286.15 |        | 266.60 | 83.6  | 439,475    | 5.22     | 9.5      | 2,383      | 5.37            | 0   | 1   | -    |
| NO <sub>2</sub>   | I     | 295.08 | 430.95 | 261.95 | 64.5  | 79,616     | 3.41     | 5.0      | 771        | 2.27            | 1   | 2   | -    |
| HCN               | I     | 299.15 | 456.70 | 259.86 | 61.1  | 449,947    | 3.78     | 9.7      | 4,107      | 7.66            | 0   | 1   | -    |
| CS <sub>2</sub>   | I     | 319.35 | 552.00 | 161.45 | 101.3 | 24,706     | 7.44     | 15.3     | 147        | 0.79            | 0   | 1   | -    |
| BrCN              | I     | 334.65 |        | 325.15 | 89.8  | 518,901    | 5.94     | 11.6     | 2,744      | 6.13            | 0   | 1   | -    |
| H <sub>2</sub> O  | I     | 373.15 | 647.10 | 273.15 | 44.3  | 259,249    | 2.56     | 5.0      | 3,776      | 8.09            | 0   | 2   | -    |

| Fluid                            | Group | NBP    | CT     | NFT    | $A$   | $\Gamma_s$ | $P_{av}$ | $L_{av}$ | $\Gamma_m$ | $\sigma_{r,ep}$ | $S$ | $g$ | $g'$ |
|----------------------------------|-------|--------|--------|--------|-------|------------|----------|----------|------------|-----------------|-----|-----|------|
| CSe <sub>2</sub>                 | I     | 398.65 |        | 229.55 | 111.3 | 44,880     | 8.89     | 18.3     | 249        | 0.93            | 0   | 1   | -    |
| NF <sub>3</sub>                  | II    | 144.00 | 234.00 | 64.70  | 72.2  | 19,607     | 3.38     | 5.4      | 250        | 1.12            | 0   | -   | 2    |
| PF <sub>3</sub>                  | II    | 171.35 | 271.20 | 121.65 | 84.5  | 244,452    | 4.39     | 12.0     | 1,426      | 3.12            | 0   | -   | 2    |
| BF <sub>3</sub>                  | II    | 173.25 | 260.95 | 146.35 | 73.0  | 147,871    | 3.46     | 3.6      | 2,123      | 2.54            | 0   | -   | 1    |
| PH <sub>3</sub>                  | II    | 185.40 | 324.50 | 139.35 | 73.3  | 48,356     | 5.35     | 21.3     | 473        | 2.65            | 0   | -   | 2    |
| F <sub>2</sub> CO                | II    | 188.65 | 287.85 | 161.95 | 73.5  | 140,014    | 3.56     | 4.3      | 1,661      | 6.13            | 0   | -   | 1    |
| FNO <sub>2</sub>                 | II    | 200.80 | 349.45 | 107.20 | 75.5  | 88,531     | 3.77     | 4.6      | 907        | 3.54            | 0   | -   | 1    |
| AsH <sub>3</sub>                 | II    | 210.65 | 373.05 | 157.15 | 77.8  | 27,816     | 5.89     | 23.8     | 304        | 2.54            | 0   | -   | 2    |
| NH <sub>3</sub>                  | II    | 239.82 | 405.40 | 194.95 | 52.2  | 183,473    | 3.26     | 8.3      | 2,342      | 5.87            | 0   | -   | 2    |
| HFCO                             | II    | 246.65 |        | 130.95 | 68.0  | 405,976    | 3.57     | 7.0      | 2,846      | 6.50            | 0   | -   | 1    |
| NHF <sub>2</sub>                 | II    | 250.00 | 403.00 | 157.15 | 65.8  | 274,387    | 3.27     | 6.6      | 2,845      | 4.09            | 0   | -   | 2    |
| CNCN                             | II    | 252.05 | 397.00 | 245.32 | 88.2  | 252,155    | 5.38     | 9.8      | 1,165      | 4.58            | 0   | -   | 0    |
| CINO <sub>2</sub>                | II    | 257.25 |        | 128.15 | 91.9  | 117,007    | 5.30     | 8.5      | 687        | 2.95            | 0   | -   | 1    |
| ClO <sub>2</sub> F               | II    | 267.15 |        | 158.15 | 85.0  | 385,349    | 4.44     | 6.3      | 2,629      | 5.10            | 0   | -   | 2    |
| Cl <sub>2</sub> CO               | II    | 280.71 | 455.00 | 145.37 | 104.9 | 198,558    | 6.48     | 10.9     | 968        | 5.06            | 0   | -   | 1    |
| ClF <sub>3</sub>                 | II    | 284.90 | 426.20 | 196.81 | 84.1  | 377,426    | 4.18     | 5.4      | 2,043      | 4.99            | 0   | -   | 1    |
| BCl <sub>3</sub>                 | II    | 285.75 | 455.15 | 166.15 | 120.5 | 57,147     | 7.89     | 13.8     | 404        | 1.48            | 0   | -   | 1    |
| SO <sub>3</sub>                  | II    | 317.65 | 491.00 | 289.95 | 84.6  | 279,896    | 4.52     | 5.5      | 2,442      | 3.14            | 0   | -   | 1    |
| BrO <sub>2</sub> F               | II    | 328.15 |        | 264.15 | 91.2  | 737,639    | 4.96     | 7.3      | 3,901      | 4.74            | 0   | -   | 2    |
| H <sub>2</sub> CO                | II    | 329.23 | 508.00 | 178.25 | 62.8  | 456,331    | 3.69     | 9.9      | 2,861      | 5.95            | 0   | -   | 1    |
| AsF <sub>3</sub>                 | II    | 330.28 |        | 267.25 | 89.1  | 754,821    | 4.75     | 12.1     | 3,234      | 4.96            | 0   | -   | 2    |
| NCl <sub>3</sub>                 | II    | 344.15 |        | 233.15 | 116.7 | 92,088     | 7.66     | 13.6     | 467        | 1.90            | 0   | -   | 2    |
| PCl <sub>3</sub>                 | II    | 349.15 | 563.00 | 180.15 | 129.4 | 120,693    | 8.72     | 17.4     | 402        | 1.80            | 0   | -   | 2    |
| BBr <sub>3</sub>                 | II    | 364.45 | 573.15 | 227.15 | 137.4 | 87,510     | 9.97     | 18.2     | 351        | 1.59            | 0   | -   | 1    |
| BrF <sub>3</sub>                 | II    | 398.95 |        | 281.92 | 89.5  | 605,150    | 4.64     | 7.0      | 3,274      | 6.76            | 0   | -   | 1    |
| AsCl <sub>3</sub>                | II    | 403.15 | 654.00 | 257.15 | 134.7 | 327,976    | 9.19     | 18.0     | 960        | 2.78            | 0   | -   | 2    |
| PBr <sub>3</sub>                 | II    | 446.35 | 711.00 | 231.65 | 146.4 | 163,856    | 10.84    | 20.7     | 368        | 1.71            | 0   | -   | 2    |
| BI <sub>3</sub>                  | II    | 482.65 |        | 322.85 | 166.0 | 146,591    | 13.62    | 29.6     | 298        | 1.61            | 0   | -   | 1    |
| AsBr <sub>3</sub>                | II    | 494.15 |        | 304.25 | 151.4 | 330,190    | 11.32    | 21.4     | 725        | 2.44            | 0   | -   | 2    |
| CH <sub>4</sub>                  | III   | 111.00 | 190.60 | 90.60  | 59.7  | 4,966      | 3.73     | 14.3     | 62         | 0.57            | 0   | -   | -    |
| CF <sub>4</sub>                  | III   | 145.10 | 227.50 | 89.57  | 81.3  | 18,165     | 3.69     | 3.8      | 316        | 0.61            | 0   | -   | -    |
| SiH <sub>4</sub>                 | III   | 161.15 | 269.69 | 88.15  | 80.5  | 2,926      | 5.63     | 30.4     | 141        | 0.17            | 0   | -   | -    |
| SiH <sub>3</sub> F               | III   | 174.55 |        |        | 83.2  | 222,574    | 5.13     | 25.8     | 1,907      | 5.12            | 0   | -   | -    |
| SiHF <sub>3</sub>                | III   | 178.15 |        | 141.75 | 89.0  | 360,464    | 4.56     | 12.6     | 1,931      | 3.85            | 0   | -   | -    |
| GeH <sub>4</sub>                 | III   | 183.15 | 312.20 | 108.15 | 83.0  | 827        | 5.97     | 31.3     | 98         | 0.10            | 0   | -   | -    |
| SiF <sub>4</sub>                 | III   | 187.00 | 259.00 | 182.95 | 92.7  | 176,656    | 4.41     | 4.3      | 1,487      | 2.24            | 0   | -   | -    |
| CHF <sub>3</sub>                 | III   | 191.09 | 299.01 | 117.97 | 75.9  | 238,080    | 3.63     | 6.2      | 1,628      | 2.98            | 0   | -   | -    |
| CF <sub>3</sub> Cl               | III   | 191.74 | 302.00 | 92.15  | 96.5  | 48,005     | 5.01     | 7.6      | 304        | 1.21            | 0   | -   | -    |
| CH <sub>3</sub> F                | III   | 195.00 | 317.40 | 129.85 | 65.1  | 268,472    | 3.60     | 11.7     | 1,749      | 4.25            | 0   | -   | -    |
| SiH <sub>2</sub> F <sub>2</sub>  | III   | 195.30 |        | 151.15 | 85.9  | 395,067    | 4.79     | 19.9     | 2,046      | 4.78            | 0   | -   | -    |
| CF <sub>3</sub> Br               | III   | 215.26 | 340.15 | 105.15 | 102.6 | 59,841     | 5.62     | 9.6      | 382        | 1.32            | 0   | -   | -    |
| SnH <sub>4</sub>                 | III   | 221.15 |        | 127.15 | 93.2  | 29,833     | 7.05     | 38.9     | 316        | 0.63            | 0   | -   | -    |
| CH <sub>2</sub> F <sub>2</sub>   | III   | 221.50 | 351.26 | 136.35 | 70.5  | 386,448    | 3.59     | 9.1      | 1,893      | 4.61            | 0   | -   | -    |
| CHF <sub>2</sub> Cl              | III   | 232.32 | 369.30 | 115.73 | 91.8  | 227,101    | 5.05     | 9.7      | 1,216      | 3.62            | 0   | -   | -    |
| SF <sub>4</sub>                  | III   | 236.00 | 364.10 | 152.00 | 91.3  | 281,449    | 4.43     | 6.4      | 1,559      | 5.06            | 0   | -   | -    |
| GeF <sub>4</sub>                 | III   | 236.70 |        |        | 99.5  | 321,837    | 4.85     | 4.4      | 2,338      | 2.66            | 0   | -   | -    |
| SiF <sub>2</sub> Cl <sub>2</sub> | III   | 241.00 | 369.00 | 229.15 | 123.5 | 156,731    | 7.15     | 11.1     | 820        | 3.10            | 0   | -   | -    |
| SiH <sub>3</sub> Cl              | III   | 242.75 |        | 155.15 | 99.6  | 203,376    | 6.77     | 26.3     | 993        | 2.85            | 0   | -   | -    |
| CF <sub>2</sub> Cl <sub>2</sub>  | III   | 243.42 | 384.95 | 115.16 | 110.7 | 61,260     | 6.35     | 10.7     | 302        | 2.23            | 0   | -   | -    |

| Fluid                            | Group | NBP    | CT     | NFT    | $A$   | $\Gamma_s$ | $P_{av}$ | $L_{av}$ | $\Gamma_m$ | $\sigma_{r,ep}$ | $S$ | $g$ | $g'$ |
|----------------------------------|-------|--------|--------|--------|-------|------------|----------|----------|------------|-----------------|-----|-----|------|
| CH <sub>3</sub> Cl               | III   | 247.00 | 416.00 | 175.55 | 81.7  | 281,523    | 5.24     | 14.4     | 1,015      | 3.40            | 0   | -   | -    |
| CF <sub>3</sub> I                | III   | 251.34 | 395.00 |        | 113.3 | 101,810    | 6.68     | 14.7     | 543        | 1.76            | 0   | -   | -    |
| CHF <sub>2</sub> Br              | III   | 257.67 | 411.98 | 128.00 | 98.1  | 241,008    | 5.70     | 11.6     | 1,171      | 3.52            | 0   | -   | -    |
| CH <sub>2</sub> FCl              | III   | 264.00 | 427.00 | 138.05 | 86.9  | 342,702    | 5.11     | 12.0     | 1,484      | 4.84            | 0   | -   | -    |
| CF <sub>2</sub> ClBr             | III   | 269.14 | 426.15 | 113.65 | 116.6 | 74,965     | 6.99     | 12.5     | 383        | 2.30            | 0   | -   | -    |
| CH <sub>3</sub> Br               | III   | 276.60 | 467.00 | 179.55 | 88.1  | 284,354    | 5.99     | 16.0     | 933        | 3.44            | 0   | -   | -    |
| SiH <sub>2</sub> Cl <sub>2</sub> | III   | 281.30 | 449.15 | 151.15 | 117.9 | 220,235    | 7.88     | 22.4     | 834        | 2.30            | 0   | -   | -    |
| CHFCl <sub>2</sub>               | III   | 282.01 | 451.60 | 138.15 | 106.6 | 212,484    | 6.48     | 12.5     | 999        | 3.49            | 0   | -   | -    |
| SiFCl <sub>3</sub>               | III   | 285.40 | 438.41 |        | 137.8 | 84,372     | 8.54     | 13.9     | 441        | 3.67            | 0   | -   | -    |
| CH <sub>2</sub> FBr              | III   | 292.15 |        |        | 93.2  | 352,905    | 5.81     | 13.8     | 1,398      | 4.67            | 0   | -   | -    |
| CHF <sub>2</sub> I               | III   | 295.15 |        | 151.15 | 108.8 | 272,581    | 6.83     | 16.7     | 1,107      | 3.72            | 0   | -   | -    |
| CF <sub>2</sub> Br <sub>2</sub>  | III   | 295.94 | 471.30 | 163.05 | 122.5 | 90,031     | 7.64     | 14.2     | 405        | 2.31            | 0   | -   | -    |
| CFCl <sub>3</sub>                | III   | 296.90 | 471.10 | 162.72 | 123.8 | 78,012     | 7.66     | 13.1     | 314        | 2.12            | 0   | -   | -    |
| SiHCl <sub>3</sub>               | III   | 306.00 | 479.00 | 144.95 | 135.2 | 126,055    | 8.93     | 19.0     | 477        | 1.51            | 0   | -   | -    |
| CHFClBr                          | III   | 309.26 |        | 158.15 | 112.6 | 227,527    | 7.16     | 14.2     | 974        | 3.40            | 0   | -   | -    |
| CH <sub>2</sub> Cl <sub>2</sub>  | III   | 312.90 | 510.00 | 178.01 | 102.2 | 297,232    | 6.65     | 14.6     | 1,053      | 3.40            | 0   | -   | -    |
| CH <sub>3</sub> I                | III   | 315.70 | 527.95 | 207.00 | 98.8  | 291,472    | 7.27     | 20.6     | 814        | 3.22            | 0   | -   | -    |
| CH <sub>2</sub> FI               | III   | 326.00 |        |        | 104.0 | 373,703    | 7.00     | 18.6     | 1,271      | 4.55            | 0   | -   | -    |
| SiCl <sub>4</sub>                | III   | 330.80 | 508.10 | 204.41 | 151.3 | 37,022     | 9.91     | 16.3     | 193        | 0.58            | 0   | -   | -    |
| CHCl <sub>3</sub>                | III   | 334.33 | 536.40 | 209.68 | 120.2 | 195,743    | 7.89     | 14.8     | 752        | 2.41            | 0   | -   | -    |
| CHFBr <sub>2</sub>               | III   | 338.00 |        | 195.15 | 118.5 | 244,057    | 7.85     | 15.9     | 953        | 3.32            | 0   | -   | -    |
| CH <sub>2</sub> ClBr             | III   | 341.20 | 557.00 | 185.20 | 108.3 | 302,798    | 7.37     | 16.2     | 989        | 3.21            | 0   | -   | -    |
| CCl <sub>4</sub>                 | III   | 349.79 | 556.35 | 250.33 | 135.7 | 96,091     | 8.91     | 15.0     | 268        | 1.13            | 0   | -   | -    |
| CFCIBr <sub>2</sub>              | III   | 353.00 |        |        | 135.0 | 113,691    | 8.97     | 16.3     | 419        | 2.15            | 0   | -   | -    |
| GeCl <sub>4</sub>                | III   | 359.70 | 553.20 | 221.65 | 157.3 | 58,238     | 10.39    | 17.2     | 290        | 0.70            | 0   | -   | -    |
| CHCl <sub>2</sub> Br             | III   | 363.20 |        | 216.00 | 126.0 | 209,682    | 8.57     | 16.4     | 737        | 2.30            | 0   | -   | -    |
| CH <sub>2</sub> Br <sub>2</sub>  | III   | 370.15 | 610.00 | 221.05 | 114.2 | 309,286    | 8.11     | 17.8     | 926        | 3.03            | 0   | -   | -    |
| CF <sub>2</sub> I <sub>2</sub>   | III   | 374.15 |        | 201.15 | 142.8 | 157,790    | 9.94     | 23.3     | 540        | 2.73            | 0   | -   | -    |
| CHFBrl                           | III   | 376.00 |        |        | 128.7 | 274,741    | 9.03     | 20.5     | 927        | 3.37            | 0   | -   | -    |
| CHFI <sub>2</sub>                | III   | 373.45 |        | 238.65 | 138.8 | 306,757    | 10.23    | 24.8     | 898        | 3.35            | 0   | -   | -    |
| CCl <sub>3</sub> Br              | III   | 376.65 |        | 267.55 | 141.1 | 114,585    | 9.56     | 16.4     | 349        | 1.18            | 0   | -   | -    |
| CFBr <sub>3</sub>                | III   | 379.50 |        | 199.15 | 140.5 | 135,052    | 9.63     | 17.7     | 438        | 2.13            | 0   | -   | -    |
| CH <sub>2</sub> ClI              | III   | 382.00 |        |        | 118.6 | 320,557    | 8.59     | 20.8     | 904        | 2.91            | 0   | -   | -    |
| SnCl <sub>4</sub>                | III   | 387.30 | 591.90 | 239.08 | 168.6 | 110,895    | 11.29    | 18.2     | 598        | 0.82            | 0   | -   | -    |
| CHClBr <sub>2</sub>              | III   | 393.00 |        | 253.15 | 131.6 | 225,740    | 9.26     | 17.9     | 725        | 2.23            | 0   | -   | -    |
| CHCl <sub>2</sub> I              | III   | 404.00 |        |        | 135.9 | 236,083    | 9.74     | 20.8     | 724        | 2.21            | 0   | -   | -    |
| CH <sub>2</sub> BrI              | III   | 409.15 |        | 274.00 | 124.5 | 328,156    | 9.35     | 22.2     | 855        | 2.78            | 0   | -   | -    |
| CHBr <sub>3</sub>                | III   | 422.35 | 696.00 | 281.20 | 137.2 | 243,776    | 9.96     | 19.3     | 711        | 2.18            | 0   | -   | -    |
| CCl <sub>2</sub> Br <sub>2</sub> | III   | 423.35 |        | 311.15 | 146.4 | 135,735    | 10.21    | 17.8     | 366        | 1.23            | 0   | -   | -    |
| SiBr <sub>4</sub>                | III   | 427.00 | 663.00 | 278.54 | 172.4 | 94,003     | 12.51    | 21.5     | 194        | 0.85            | 0   | -   | -    |
| CH <sub>2</sub> I <sub>2</sub>   | III   | 455.15 |        | 279.15 | 134.6 | 347,829    | 10.62    | 26.5     | 784        | 2.56            | 0   | -   | -    |
| GeBr <sub>4</sub>                | III   | 459.50 | 718.00 | 299.25 | 178.3 | 119,420    | 13.04    | 22.6     | 263        | 0.98            | 0   | -   | -    |
| CHClI <sub>2</sub>               | III   | 473.00 |        | 269.15 | 151.1 | 283,703    | 11.63    | 26.1     | 694        | 2.03            | 0   | -   | -    |
| SnBr <sub>4</sub>                | III   | 478.00 | 744.00 | 304.00 | 189.8 | 142,904    | 14.00    | 24.0     | 436        | 0.93            | 0   | -   | -    |
| CCl <sub>3</sub> I               | III   |        |        | 265.35 | 150.5 | 145,471    | 10.67    | 20.5     | 465        | 1.37            | 0   | -   | -    |
| CH <sub>3</sub> SH               | III   | 279.11 | 469.95 | 150.18 | 88.6  | 241,847    | 6.01     | 18.2     | 1,016      | 3.64            | 0   | -   | -    |
| CH <sub>3</sub> OH               | III   | 337.85 | 512.64 | 175.47 | 70.9  | 263,663    | 4.24     | 12.6     | 2,514      | 7.16            | 0   | -   | -    |
| CH <sub>3</sub> NH <sub>2</sub>  | III   | 266.82 | 430.05 | 179.69 | 77.1  | 173,901    | 4.84     | 14.8     | 1,684      | 5.38            | 0   | -   | -    |
| CH <sub>3</sub> CH <sub>3</sub>  | IV    | 184.55 | 305.32 | 90.35  | 83.5  | 7,199      | 5.26     | 19.3     | 49         | 0.67            | 0   | -   | -    |

| Fluid                                                           | Group | NBP    | CT     | NFT    | $A$   | $\Gamma_s$ | $P_{av}$ | $L_{av}$ | $\Gamma_m$ | $\sigma_{r,ep}$ | $S$ | $g$ | $g'$ |
|-----------------------------------------------------------------|-------|--------|--------|--------|-------|------------|----------|----------|------------|-----------------|-----|-----|------|
| CH <sub>3</sub> CH <sub>2</sub> F                               | IV    | 235.45 | 375.31 | 129.95 | 88.4  | 334,482    | 5.13     | 16.6     | 1,512      | 4.14            | 0   | -   | -    |
| CH <sub>2</sub> FCH <sub>2</sub> F                              | IV    | 283.65 |        |        | 93.7  | 485,876    | 5.06     | 14.0     | 1,337      | 3.86            | 0   | -   | -    |
| CH <sub>3</sub> CH <sub>2</sub> Cl                              | IV    | 285.42 | 460.35 | 136.75 | 103.4 | 368,419    | 6.65     | 18.8     | 923        | 3.40            | 0   | -   | -    |
| CH <sub>3</sub> CH <sub>2</sub> Br                              | IV    | 311.50 | 503.80 | 154.55 | 109.4 | 384,793    | 7.36     | 20.1     | 873        | 3.46            | 0   | -   | -    |
| CH <sub>3</sub> CH <sub>2</sub> I                               | IV    | 345.45 | 561.00 | 162.05 | 119.6 | 399,077    | 8.55     | 24.2     | 781        | 3.25            | 0   | -   | -    |
| CH <sub>2</sub> ClCH <sub>2</sub> Cl                            | IV    | 356.59 | 561.60 | 237.49 | 123.2 | 384,522    | 7.99     | 18.3     | 758        | 2.84            | 0   | -   | -    |
| CH <sub>2</sub> BrCH <sub>2</sub> Br                            | IV    | 404.51 | 650.15 | 282.94 | 135.2 | 393,794    | 9.42     | 20.9     | 705        | 2.62            | 0   | -   | -    |
| CH <sub>2</sub> I CH <sub>2</sub> I                             | IV    | 473.16 |        | 356.16 | 155.6 | 436,934    | 11.88    | 29.1     | 644        | 2.33            | 0   | -   | -    |
| Cyclopropane                                                    | IV    | 240.00 | 398.00 | 146.00 | 93.0  | 59,448     | 5.88     | 17.4     | 251        | 2.26            | 0   | -   | -    |
| CH <sub>3</sub> CH <sub>2</sub> SH                              | IV    | 308.15 | 499.15 | 125.26 | 109.5 | 289,644    | 7.35     | 21.8     | 953        | 3.61            | 0   | -   | -    |
| CH <sub>3</sub> CH <sub>2</sub> OH                              | IV    | 351.44 | 513.92 | 159.05 | 93.4  | 316,314    | 5.71     | 17.3     | 2,297      | 6.65            | 0   | -   | -    |
| CH <sub>3</sub> CH <sub>2</sub> NH <sub>2</sub>                 | IV    | 289.73 | 456.15 | 192.15 | 98.9  | 187,254    | 6.29     | 18.9     | 1,214      | 5.18            | 0   | -   | -    |
| CH <sub>2</sub> SHCH <sub>2</sub> SH                            | IV    | 419.20 |        | 231.95 | 135.4 | 580,583    | 9.43     | 24.2     | 1,057      | 4.08            | 0   | -   | -    |
| CH <sub>2</sub> OHCH <sub>2</sub> OH                            | IV    | 470.45 | 720.00 | 260.15 | 103.4 | 756,363    | 6.17     | 15.3     | 2,825      | 7.96            | 0   | -   | -    |
| CH <sub>3</sub> CH <sub>2</sub> CH <sub>3</sub>                 | IV    | 231.11 | 369.83 | 85.47  | 104.8 | 12,631     | 6.67     | 22.8     | 54         | 0.76            | 0   | -   | -    |
| CH <sub>3</sub> CHFCH <sub>3</sub>                              | IV    | 263.81 |        | 139.80 | 108.9 | 374,044    | 6.50     | 20.0     | 1,341      | 3.94            | 0   | -   | -    |
| CH <sub>3</sub> CH <sub>2</sub> CH <sub>2</sub> F               | IV    | 269.95 |        | 114.16 | 109.7 | 405,073    | 6.51     | 20.2     | 1,390      | 3.60            | 0   | -   | -    |
| CH <sub>3</sub> CHClCH <sub>3</sub>                             | IV    | 308.85 |        | 155.97 | 122.2 | 424,692    | 7.89     | 21.6     | 857        | 3.39            | 0   | -   | -    |
| CH <sub>3</sub> CH <sub>2</sub> CH <sub>2</sub> Cl              | IV    | 319.67 | 503.15 | 150.35 | 124.6 | 454,316    | 8.02     | 22.3     | 887        | 3.20            | 0   | -   | -    |
| CH <sub>3</sub> CHBrCH <sub>3</sub>                             | IV    | 333.00 | 532.00 | 184.20 | 127.8 | 457,232    | 8.55     | 22.7     | 824        | 3.31            | 0   | -   | -    |
| CH <sub>3</sub> CH <sub>2</sub> CH <sub>2</sub> Br              | IV    | 344.15 | 536.94 | 163.15 | 130.6 | 476,137    | 8.72     | 23.6     | 841        | 3.25            | 0   | -   | -    |
| CH <sub>3</sub> CHICH <sub>3</sub>                              | IV    | 362.40 |        | 183.15 | 137.4 | 481,442    | 9.67     | 26.2     | 752        | 3.22            | 0   | -   | -    |
| CH <sub>3</sub> CH <sub>2</sub> CH <sub>2</sub> I               | IV    | 375.60 |        | 171.85 | 140.8 | 492,594    | 9.90     | 27.7     | 757        | 3.10            | 0   | -   | -    |
| CH <sub>3</sub> CHSHCH <sub>3</sub>                             | IV    | 328.00 | 517.30 | 142.61 | 127.5 | 311,935    | 8.52     | 23.8     | 879        | 3.65            | 0   | -   | -    |
| CH <sub>3</sub> CH <sub>2</sub> CH <sub>2</sub> SH              | IV    | 339.80 | 533.00 | 167.23 | 130.6 | 344,246    | 8.72     | 25.2     | 919        | 3.48            | 0   | -   | -    |
| CH <sub>3</sub> CHOHCH <sub>3</sub>                             | IV    | 355.50 | 509.00 | 185.75 | 113.1 | 338,159    | 7.02     | 20.4     | 2,122      | 6.26            | 0   | -   | -    |
| CH <sub>3</sub> CH <sub>2</sub> CH <sub>2</sub> OH              | IV    | 370.35 | 536.78 | 146.95 | 114.6 | 365,465    | 7.09     | 20.8     | 2,180      | 6.25            | 0   | -   | -    |
| CH <sub>2</sub> NH <sub>2</sub> CH <sub>2</sub> NH <sub>2</sub> | IV    | 390.41 | 613.10 | 284.29 | 114.1 | 522,945    | 7.31     | 18.5     | 1,714      | 5.82            | 0   | -   | -    |
| CH <sub>3</sub> CHNH <sub>2</sub> CH <sub>3</sub>               | IV    | 304.92 | 471.90 | 177.95 | 117.8 | 226,757    | 7.54     | 21.5     | 1,187      | 4.98            | 0   | -   | -    |
| CH <sub>3</sub> CH <sub>2</sub> CH <sub>2</sub> NH <sub>2</sub> | IV    | 321.00 | 496.95 | 190.15 | 120.0 | 255,086    | 7.64     | 22.5     | 1,380      | 4.75            | 0   | -   | -    |

\*The available experimental normal boiling points (NBPs), critical temperatures (CTs) and normal freezing points (NFPs), in Kelvins, of the studied fluids were laboriously and scrupulously compiled, filtered and mainly doubled-checked, from different reputable sources and peer-reviewed literature.<sup>1-18</sup> Some fluids properties were extracted from or double checked in dedicated works.<sup>19-34</sup> Safety datasheets of some laboratories and reputable institutions were also made use of to augment our datasets accuracy as much as possible.<sup>35-40</sup>

**Table S2:**

The dependence table of normal boiling points (NBP's) of 42 mono-, di- and triatomic compounds. The table shows the effect of successive addition of molecular descriptors as independent variables on the correlation parameters (R, adjusted R<sup>2</sup> and SE) in addition to the coefficients and p-values of the independent variables.

| Group I (42 NBP's)                                                                                    |       |                        |       | <i>A</i>                            | <i>Γ<sub>s</sub></i>                                      | <i>P<sub>av</sub></i>               | <i>L<sub>av</sub></i>               | <i>Γ<sub>m</sub></i>                                     | <i>σ<sub>r,ep</sub></i>             | <i>S</i>                            | <i>g</i>                            | Intercept |        |
|-------------------------------------------------------------------------------------------------------|-------|------------------------|-------|-------------------------------------|-----------------------------------------------------------|-------------------------------------|-------------------------------------|----------------------------------------------------------|-------------------------------------|-------------------------------------|-------------------------------------|-----------|--------|
| <i>Variable</i><br><i>s</i>                                                                           | R     | Adj.<br>R <sup>2</sup> | SE    | coeff                               | coeff                                                     | coeff                               | coeff                               | coeff                                                    | coeff                               | coeff                               | coeff                               |           |        |
|                                                                                                       |       |                        |       | p-val                               | p-val                                                     | p-val                               | p-val                               | p-val                                                    | p-val                               | p-val                               | p-val                               |           |        |
| <i>A</i>                                                                                              | 0.764 | 0.573                  | 67.32 | 3.84<br>4.08 ×<br>10 <sup>-9</sup>  |                                                           |                                     |                                     |                                                          |                                     |                                     |                                     | -47.42    |        |
| <i>A + Γ<sub>s</sub></i>                                                                              | 0.830 | 0.673                  | 58.84 | 3.48<br>3.59 ×<br>10 <sup>-9</sup>  | 2.27 ×<br>10 <sup>-4</sup><br>7.57 ×<br>10 <sup>-4</sup>  |                                     |                                     |                                                          |                                     |                                     |                                     | -52.42    |        |
| <i>A + Γ<sub>s</sub> + P<sub>av</sub></i>                                                             | 0.851 | 0.702                  | 56.20 | 0.04<br>9.81 ×<br>10 <sup>-1</sup>  | 2.80 ×<br>10 <sup>-4</sup><br>9.28 ×<br>10 <sup>-5</sup>  | 38.99<br>3.55 ×<br>10 <sup>-2</sup> |                                     |                                                          |                                     |                                     |                                     | 6.28      |        |
| <i>A + Γ<sub>s</sub> + P<sub>av</sub> + L<sub>av</sub></i>                                            | 0.876 | 0.742                  | 52.34 | -2.76<br>1.47 ×<br>10 <sup>-1</sup> | 2.90 ×<br>10 <sup>-4</sup><br>2.31 ×<br>10 <sup>-5</sup>  | 76.45<br>1.32 ×<br>10 <sup>-3</sup> | -5.38<br>1.31 ×<br>10 <sup>-2</sup> |                                                          |                                     |                                     |                                     |           | 87.86  |
| <i>A + Γ<sub>s</sub> + P<sub>av</sub> + L<sub>av</sub> + Γ<sub>m</sub></i>                            | 0.954 | 0.897                  | 33.09 | 1.98<br>1.48 ×<br>10 <sup>-1</sup>  | -1.60 ×<br>10 <sup>-4</sup><br>2.99 ×<br>10 <sup>-2</sup> | 27.85<br>7.76 ×<br>10 <sup>-2</sup> | -1.25<br>3.84 ×<br>10 <sup>-1</sup> | 6.31 ×<br>10 <sup>-2</sup><br>6.85 ×<br>10 <sup>-9</sup> |                                     |                                     |                                     |           | -74.10 |
| <i>A + Γ<sub>s</sub> + P<sub>av</sub> + L<sub>av</sub> + Γ<sub>m</sub> + σ<sub>r,ep</sub></i>         | 0.954 | 0.894                  | 33.52 | 1.85<br>2.04 ×<br>10 <sup>-1</sup>  | -1.63 ×<br>10 <sup>-4</sup><br>3.10 ×<br>10 <sup>-2</sup> | 29.12<br>8.08 ×<br>10 <sup>-2</sup> | -1.33<br>3.71 ×<br>10 <sup>-1</sup> | 6.05 ×<br>10 <sup>-2</sup><br>3.19 ×<br>10 <sup>-5</sup> | 1.77<br>7.84 ×<br>10 <sup>-1</sup>  |                                     |                                     |           | -72.16 |
| <i>A + Γ<sub>s</sub> + P<sub>av</sub> + L<sub>av</sub> + Γ<sub>m</sub> + σ<sub>r,ep</sub> + S</i>     | 0.964 | 0.914                  | 30.16 | 1.43<br>2.76 ×<br>10 <sup>-1</sup>  | -1.78 ×<br>10 <sup>-4</sup><br>1.02 ×<br>10 <sup>-2</sup> | 34.56<br>2.45 ×<br>10 <sup>-2</sup> | -86<br>5.19 ×<br>10 <sup>-1</sup>   | 6.03 ×<br>10 <sup>-2</sup><br>7.18 ×<br>10 <sup>-6</sup> | 4.12<br>4.83 ×<br>10 <sup>-1</sup>  | 51.83<br>4.52 ×<br>10 <sup>-3</sup> |                                     |           | -81.60 |
| <i>A + Γ<sub>s</sub> + P<sub>av</sub> + L<sub>av</sub> + Γ<sub>m</sub> + σ<sub>r,ep</sub> + S + g</i> | 0.967 | 0.919                  | 29.29 | 0.59<br>6.63 ×<br>10 <sup>-1</sup>  | -1.53 ×<br>10 <sup>-4</sup><br>2.45 ×<br>10 <sup>-2</sup> | 43.42<br>7.13 ×<br>10 <sup>-3</sup> | -1.25<br>3.44 ×<br>10 <sup>-1</sup> | 6.41 ×<br>10 <sup>-2</sup><br>2.47 ×<br>10 <sup>-6</sup> | -1.54<br>8.14 ×<br>10 <sup>-1</sup> | 43.05<br>1.80 ×<br>10 <sup>-2</sup> | 18.82<br>9.00 ×<br>10 <sup>-2</sup> |           | -70.39 |

**Table S3**

The dependence table of normal boiling points (NBP's) of 28 tetratomic compounds. The table shows the effect of successive addition of molecular descriptors as independent variables on the correlation parameters (R, adjusted R<sup>2</sup> and SE) in addition to the coefficients and p-values of the independent variables.

| Group II (28 NBP's)                                                                                |       |                        |       | <i>A</i> | $\Gamma_s$              | $P_{av}$ | $L_{av}$ | $\Gamma_m$              | $\sigma_{r,ep}$ | $g'$  | Intercept |
|----------------------------------------------------------------------------------------------------|-------|------------------------|-------|----------|-------------------------|----------|----------|-------------------------|-----------------|-------|-----------|
| Variable<br><i>s</i>                                                                               | R     | Adj.<br>R <sup>2</sup> | SE    | coeff    | coeff                   | coeff    | coeff    | coeff                   | coeff           | coeff |           |
|                                                                                                    |       |                        |       | p-val    | p-val                   | p-val    | p-val    | p-val                   | p-val           | p-val |           |
| <i>A</i>                                                                                           | 0.803 | 0.631                  | 57.09 | 2.52     |                         |          |          |                         |                 |       | 51.96     |
| <i>A + Γ<sub>s</sub></i>                                                                           | 0.907 | 0.808                  | 41.15 | 2.69     | 2.00 × 10 <sup>-4</sup> |          |          |                         |                 |       | -15.61    |
| <i>A + Γ<sub>s</sub> + P<sub>av</sub></i>                                                          | 0.931 | 0.850                  | 36.40 | -1.8     | 2.40 × 10 <sup>-4</sup> | 31.67    |          |                         |                 |       | 60.74     |
| <i>A + Γ<sub>s</sub> + P<sub>av</sub> + L<sub>av</sub></i>                                         | 0.953 | 0.893                  | 30.79 | -3.66    | 2.55 × 10 <sup>-4</sup> | 84.58    | -8.19    |                         |                 |       | 172.36    |
| <i>A + Γ<sub>s</sub> + P<sub>av</sub> + L<sub>av</sub> + Γ<sub>m</sub></i>                         | 0.953 | 0.888                  | 31.43 | -3.36    | 2.29 × 10 <sup>-4</sup> | 81.29    | -7.65    | 5.62 × 10 <sup>-3</sup> |                 |       | 154.46    |
| <i>A + Γ<sub>s</sub> + P<sub>av</sub> + L<sub>av</sub> + Γ<sub>m</sub> + σ<sub>r,ep</sub></i>      | 0.954 | 0.884                  | 32.03 | -2.98    | 2.12 × 10 <sup>-4</sup> | 77.20    | -7.10    | 6.17 × 10 <sup>-3</sup> | 2.79            |       | 129.96    |
| <i>A + Γ<sub>s</sub> + P<sub>av</sub> + L<sub>av</sub> + Γ<sub>m</sub> + σ<sub>r,ep</sub> + g'</i> | 0.955 | 0.881                  | 32.40 | -3.24    | 2.13 × 10 <sup>-4</sup> | 81.68    | -8.09    | 3.42 × 10 <sup>-3</sup> | 4.55            | 9.65  | 122.78    |

**Table S4**

The dependence table of normal boiling points (NBPs) of 67 compounds (pentatomic compounds and some methane derivatives). The table shows the effect of successive addition of molecular descriptors as independent variables on the correlation parameters (R, adjusted R<sup>2</sup> and SE) in addition to the coefficients and p-values of the independent variables.

| <b>Group III (67 NBP's)</b>                                                                   |       |                     |       | <i>A</i>               | <i>Γ<sub>s</sub></i>  | <i>P<sub>av</sub></i>  | <i>L<sub>av</sub></i>  | <i>Γ<sub>m</sub></i>  | <i>σ<sub>r,ep</sub></i> | Intercept |
|-----------------------------------------------------------------------------------------------|-------|---------------------|-------|------------------------|-----------------------|------------------------|------------------------|-----------------------|-------------------------|-----------|
| <i>Variable</i>                                                                               | R     | Adj. R <sup>2</sup> | SE    | coeff                  | coeff                 | coeff                  | coeff                  | coeff                 | coeff                   |           |
| <i>s</i>                                                                                      |       |                     |       | p-val                  | p-val                 | p-val                  | p-val                  | p-val                 | p-val                   |           |
| <i>A</i>                                                                                      | 0.826 | 0.677               | 49.14 | 2.50                   |                       |                        |                        |                       |                         | 17.29     |
|                                                                                               |       |                     |       | $7.98 \times 10^{-18}$ |                       |                        |                        |                       |                         |           |
| <i>A + Γ<sub>s</sub></i>                                                                      | 0.903 | 0.809               | 37.81 | 2.76                   | $2.98 \times 10^{-4}$ |                        |                        |                       |                         | -71.17    |
|                                                                                               |       |                     |       | $1.01 \times 10^{-24}$ | $4.79 \times 10^{-9}$ |                        |                        |                       |                         |           |
| <i>A + Γ<sub>s</sub> + P<sub>av</sub></i>                                                     | 0.944 | 0.886               | 29.22 | -3.30                  | $2.44 \times 10^{-4}$ | 36.28                  |                        |                       |                         | 17.87     |
|                                                                                               |       |                     |       | $5.37 \times 10^{-1}$  | $2.12 \times 10^{-9}$ | $8.17 \times 10^{-9}$  |                        |                       |                         |           |
| <i>A + Γ<sub>s</sub> + P<sub>av</sub> + L<sub>av</sub></i>                                    | 0.970 | 0.936               | 21.95 | -3.71                  | $1.74 \times 10^{-4}$ | 81.55                  | -5.66                  |                       |                         | 178.67    |
|                                                                                               |       |                     |       | $6.03 \times 10^{-8}$  | $5.09 \times 10^{-8}$ | $1.01 \times 10^{-15}$ | $1.77 \times 10^{-9}$  |                       |                         |           |
| <i>A + Γ<sub>s</sub> + P<sub>av</sub> + L<sub>av</sub> + Γ<sub>m</sub></i>                    | 0.974 | 0.944               | 20.37 | -4.49                  | $4.36 \times 10^{-5}$ | 94.28                  | -6.31                  | $3.20 \times 10^{-2}$ |                         | 181.83    |
|                                                                                               |       |                     |       | $4.77 \times 10^{-10}$ | $3.61 \times 10^{-1}$ | $2.99 \times 10^{-17}$ | $2.11 \times 10^{-11}$ | $1.51 \times 10^{-3}$ |                         |           |
| <i>A + Γ<sub>s</sub> + P<sub>av</sub> + L<sub>av</sub> + Γ<sub>m</sub> + σ<sub>r,ep</sub></i> | 0.977 | 0.951               | 19.22 | -4.27                  | $1.41 \times 10^{-5}$ | 91.95                  | -6.05                  | $1.75 \times 10^{-2}$ | 9.55                    | 162.78    |
|                                                                                               |       |                     |       | $4.42 \times 10^{-10}$ | $7.58 \times 10^{-1}$ | $1.18 \times 10^{-17}$ | $1.74 \times 10^{-11}$ | $9.77 \times 10^{-2}$ | $4.88 \times 10^{-3}$   |           |



**Table S5**

The dependence table of normal boiling points (NBP's) of 31 ethane and propane derivatives. The table shows the effect of successive addition of molecular descriptors as independent variables on the correlation parameters (R, adjusted R<sup>2</sup> and SE) in addition to the coefficients and p-values of the independent variables.

| Group IV (31 NBP's)                                                                                                                   |       |                        |       | <i>A</i>              | $\Gamma_s$            | <i>P<sub>av</sub></i> | <i>L<sub>av</sub></i> | $\Gamma_m$            | $\sigma_{r,ep}$       | Intercept |
|---------------------------------------------------------------------------------------------------------------------------------------|-------|------------------------|-------|-----------------------|-----------------------|-----------------------|-----------------------|-----------------------|-----------------------|-----------|
| <i>Variable</i><br><i>s</i>                                                                                                           | R     | Adj.<br>R <sup>2</sup> | SE    | coeff                 | coeff                 | coeff                 | coeff                 | coeff                 | coeff                 |           |
|                                                                                                                                       |       |                        |       | p-val                 | p-val                 | p-val                 | p-val                 | p-val                 | p-val                 |           |
| <i>A</i>                                                                                                                              | 0.675 | 0.437                  | 49.04 | 2.61                  |                       |                       |                       |                       |                       | 25.73     |
| <i>A + <math>\Gamma_s</math></i>                                                                                                      | 0.832 | 0.671                  | 37.51 | 1.67                  | $2.28 \times 10^{-4}$ |                       |                       |                       |                       | 52.01     |
| <i>A + <math>\Gamma_s</math> + <i>P<sub>av</sub></i></i>                                                                              | 0.852 | 0.696                  | 36.05 | -1.96                 | $2.63 \times 10^{-4}$ | 38.51                 |                       |                       |                       | 168.14    |
| <i>A + <math>\Gamma_s</math> + <i>P<sub>av</sub></i> + <i>L<sub>av</sub></i></i>                                                      | 0.879 | 0.737                  | 33.52 | -1.58                 | $1.93 \times 10^{-4}$ | 56.85                 | -10.26                |                       |                       | 227.57    |
| <i>A + <math>\Gamma_s</math> + <i>P<sub>av</sub></i> + <i>L<sub>av</sub></i> + <math>\Gamma_m</math></i>                              | 0.969 | 0.926                  | 17.79 | -3.26                 | $3.31 \times 10^{-5}$ | 89.48                 | -10.90                | $6.29 \times 10^{-2}$ |                       | 178.65    |
| <i>A + <math>\Gamma_s</math> + <i>P<sub>av</sub></i> + <i>L<sub>av</sub></i> + <math>\Gamma_m</math> + <math>\sigma_{r,ep}</math></i> | 0.969 | 0.923                  | 18.16 | -3.27                 | $3.24 \times 10^{-5}$ | 89.76                 | -10.94                | $6.49 \times 10^{-2}$ | -73                   | 179.52    |
|                                                                                                                                       |       |                        |       | $5.00 \times 10^{-3}$ | $3.97 \times 10^{-1}$ | $2.22 \times 10^{-7}$ | $1.69 \times 10^{-4}$ | $8.68 \times 10^{-3}$ | $9.29 \times 10^{-1}$ |           |

**Table S6**

The dependence table of critical temperatures (CTs) of 31 mono-, di- and triatomic compounds. The table shows the effect of successive addition of molecular descriptors as independent variables on the correlation parameters (R, adjusted R<sup>2</sup> and SE) in addition to the coefficients and p-values of the independent variables.

| Group I (31 CT's)                                                                                                                                       |       |                     |        | <i>A</i> | $\Gamma_s$             | <i>P<sub>av</sub></i> | <i>L<sub>av</sub></i> | $\Gamma_m$            | $\sigma_{r,ep}$ | <i>S</i> | <i>g</i> | Intercept |
|---------------------------------------------------------------------------------------------------------------------------------------------------------|-------|---------------------|--------|----------|------------------------|-----------------------|-----------------------|-----------------------|-----------------|----------|----------|-----------|
| <i>Variable</i>                                                                                                                                         | R     | Adj. R <sup>2</sup> | SE     | coeff    | coeff                  | coeff                 | coeff                 | coeff                 | coeff           | coeff    | coeff    |           |
| <i>s</i>                                                                                                                                                |       |                     |        | p-val    | p-val                  | p-val                 | p-val                 | p-val                 | p-val           | p-val    | p-val    |           |
| <i>A</i>                                                                                                                                                | 0.674 | 0.436               | 124.63 | 5.98     |                        |                       |                       |                       |                 |          |          | -55.22    |
| <i>A + <math>\Gamma_s</math></i>                                                                                                                        | 0.789 | 0.596               | 105.52 | 5.03     | $5.16 \times 10^{-4}$  |                       |                       |                       |                 |          |          | -52.52    |
| <i>A + <math>\Gamma_s</math> + <math>P_{av}</math></i>                                                                                                  | 0.815 | 0.627               | 101.29 | -98      | $6.05 \times 10^{-4}$  | 71.97                 |                       |                       |                 |          |          | 33.22     |
| <i>A + <math>\Gamma_s</math> + <math>P_{av}</math> + <math>L_{av}</math></i>                                                                            | 0.858 | 0.695               | 91.70  | -6.52    | $6.20 \times 10^{-4}$  | 143.73                | -9.71                 |                       |                 |          |          | 192.70    |
| <i>A + <math>\Gamma_s</math> + <math>P_{av}</math> + <math>L_{av}</math> + <math>\Gamma_m</math></i>                                                    | 0.937 | 0.852               | 63.74  | 1.97     | $-1.67 \times 10^{-4}$ | 59.54                 | -3.06                 | $9.44 \times 10^{-2}$ |                 |          |          | -80.86    |
| <i>A + <math>\Gamma_s</math> + <math>P_{av}</math> + <math>L_{av}</math> + <math>\Gamma_m</math> + <math>\sigma_{r,ep}</math></i>                       | 0.938 | 0.849               | 64.53  | 1.43     | $-1.78 \times 10^{-4}$ | 64.18                 | -3.43                 | $8.24 \times 10^{-2}$ | 8.18            |          |          | -70.71    |
| <i>A + <math>\Gamma_s</math> + <math>P_{av}</math> + <math>L_{av}</math> + <math>\Gamma_m</math> + <math>\sigma_{r,ep}</math> + <i>S</i></i>            | 0.944 | 0.859               | 62.28  | 0.38     | $-1.95 \times 10^{-4}$ | 77.49                 | -3.02                 | $8.23 \times 10^{-2}$ | 10.62           | 61.30    |          | -73.21    |
| <i>A + <math>\Gamma_s</math> + <math>P_{av}</math> + <math>L_{av}</math> + <math>\Gamma_m</math> + <math>\sigma_{r,ep}</math> + <i>S</i> + <i>g</i></i> | 0.954 | 0.878               | 57.92  | -1.13    | $-2.12 \times 10^{-4}$ | 92.58                 | -3.87                 | $1.01 \times 10^{-1}$ | -8.51           | 33.12    | 57.64    | -55.64    |

**Table S7**

The dependence table of critical temperatures (CTs) of 19 tetratomic compounds. The table shows the effect of successive addition of molecular descriptors as independent variables on the correlation parameters (R, adjusted R<sup>2</sup> and SE) in addition to the coefficients and p-values of the independent variables.

| Group II (19 CT's)                                                                                                                            |       |                        |       | <i>A</i> | $\Gamma_s$            | <i>P<sub>av</sub></i> | <i>L<sub>av</sub></i> | $\Gamma_m$             | $\sigma_{r,ep}$ | <i>g'</i> | Intercept |
|-----------------------------------------------------------------------------------------------------------------------------------------------|-------|------------------------|-------|----------|-----------------------|-----------------------|-----------------------|------------------------|-----------------|-----------|-----------|
| <i>Variable</i><br><i>s</i>                                                                                                                   | R     | Adj.<br>R <sup>2</sup> | SE    | coeff    | coeff                 | coeff                 | coeff                 | coeff                  | coeff           | coeff     |           |
|                                                                                                                                               |       |                        |       | p-val    | p-val                 | p-val                 | p-val                 | p-val                  | p-val           | p-val     | p-val     |
| <i>A</i>                                                                                                                                      | 0.764 | 0.559                  | 87.67 | 3.56     |                       |                       |                       |                        |                 |           | 102.13    |
| <i>A + <math>\Gamma_s</math></i>                                                                                                              | 0.862 | 0.710                  | 71.12 | 3.78     | $4.32 \times 10^{-4}$ |                       |                       |                        |                 |           | 2.60      |
| <i>A + <math>\Gamma_s</math> + <math>P_{av}</math></i>                                                                                        | 0.933 | 0.845                  | 51.93 | -2.33    | $5.33 \times 10^{-4}$ | 72.86                 |                       |                        |                 |           | 133.19    |
| <i>A + <math>\Gamma_s</math> + <math>P_{av}</math> + <math>L_{av}</math></i>                                                                  | 0.960 | 0.900                  | 41.87 | -7.82    | $5.00 \times 10^{-4}$ | 156.45                | -12.05                |                        |                 |           | 309.88    |
| <i>A + <math>\Gamma_s</math> + <math>P_{av}</math> + <math>L_{av}</math> + <math>\Gamma_m</math></i>                                          | 0.961 | 0.895                  | 42.82 | -6.96    | $4.16 \times 10^{-4}$ | 147.46                | -10.46                | $1.82 \times 10^{-2}$  |                 |           | 255.63    |
| <i>A + <math>\Gamma_s</math> + <math>P_{av}</math> + <math>L_{av}</math> + <math>\Gamma_m</math> + <math>\sigma_{r,ep}</math></i>             | 0.963 | 0.891                  | 43.62 | -8.07    | $4.88 \times 10^{-4}$ | 159.54                | -12.02                | $1.42 \times 10^{-2}$  | -7.92           |           | 325.78    |
| <i>A + <math>\Gamma_s</math> + <math>P_{av}</math> + <math>L_{av}</math> + <math>\Gamma_m</math> + <math>\sigma_{r,ep}</math> + <i>g'</i></i> | 0.971 | 0.908                  | 40.13 | -9.17    | $5.48 \times 10^{-4}$ | 177.34                | -16.37                | $-7.27 \times 10^{-4}$ | -3.94           | 36.15     | 319.52    |

**Table S8**

The dependence table of critical temperatures (CTs) of 42 compounds (pentatomic compounds and some methane derivatives). The table shows the effect of successive addition of molecular descriptors as independent variables on the correlation parameters (R, adjusted R<sup>2</sup> and SE) in addition to the coefficients and p-values of the independent variables.

| <b>Group III (42 CT's)</b>                                                                    |          |                           |           | <i>A</i>                 | <i>Γ<sub>s</sub></i>    | <i>P<sub>av</sub></i>   | <i>L<sub>av</sub></i>   | <i>Γ<sub>m</sub></i>    | <i>σ<sub>r,ep</sub></i> | Intercept |
|-----------------------------------------------------------------------------------------------|----------|---------------------------|-----------|--------------------------|-------------------------|-------------------------|-------------------------|-------------------------|-------------------------|-----------|
| <i>Variable</i>                                                                               | <b>R</b> | <b>Adj. R<sup>2</sup></b> | <b>SE</b> | coeff                    | coeff                   | coeff                   | coeff                   | coeff                   | coeff                   |           |
| <i>s</i>                                                                                      |          |                           |           | p-val                    | p-val                   | p-val                   | p-val                   | p-val                   | p-val                   |           |
| <i>A</i>                                                                                      | 0.772    | 0.587                     | 83.46     | 3.13                     |                         |                         |                         |                         |                         | 103.79    |
|                                                                                               |          |                           |           | 2.07 × 10 <sup>-9</sup>  |                         |                         |                         |                         |                         |           |
| <i>A + Γ<sub>s</sub></i>                                                                      | 0.895    | 0.791                     | 59.36     | 3.72                     | 5.81 × 10 <sup>-4</sup> |                         |                         |                         |                         | -58.52    |
|                                                                                               |          |                           |           | 6.32 × 10 <sup>-15</sup> | 1.80 × 10 <sup>-7</sup> |                         |                         |                         |                         |           |
| <i>A + Γ<sub>s</sub> + P<sub>av</sub></i>                                                     | 0.952    | 0.900                     | 41.12     | -1.59                    | 4.91 × 10 <sup>-4</sup> | 65.75                   |                         |                         |                         | 82.47     |
|                                                                                               |          |                           |           | 6.44 × 10 <sup>-2</sup>  | 4.58 × 10 <sup>-9</sup> | 9.18 × 10 <sup>-8</sup> |                         |                         |                         |           |
| <i>A + Γ<sub>s</sub> + P<sub>av</sub> + L<sub>av</sub></i>                                    | 0.962    | 0.918                     | 37.26     | -5.59                    | 3.75 × 10 <sup>-4</sup> | 121.08                  | -7.19                   |                         |                         | 263.97    |
|                                                                                               |          |                           |           | 7.21 × 10 <sup>-4</sup>  | 4.93 × 10 <sup>-6</sup> | 6.99 × 10 <sup>-7</sup> | 4.26 × 10 <sup>-3</sup> |                         |                         |           |
| <i>A + Γ<sub>s</sub> + P<sub>av</sub> + L<sub>av</sub> + Γ<sub>m</sub></i>                    | 0.967    | 0.926                     | 35.40     | -6.05                    | 1.99 × 10 <sup>-4</sup> | 129.81                  | -7.29                   | 4.32 × 10 <sup>-2</sup> |                         | 249.67    |
|                                                                                               |          |                           |           | 1.90 × 10 <sup>-4</sup>  | 6.08 × 10 <sup>-2</sup> | 1.11 × 10 <sup>-7</sup> | 2.50 × 10 <sup>-3</sup> | 3.18 × 10 <sup>-2</sup> |                         |           |
| <i>A + Γ<sub>s</sub> + P<sub>av</sub> + L<sub>av</sub> + Γ<sub>m</sub> + σ<sub>r,ep</sub></i> | 0.973    | 0.939                     | 32.16     | -5.79                    | 1.43 × 10 <sup>-4</sup> | 126.89                  | -6.71                   | 3.20 × 10 <sup>-3</sup> | 21.08                   | 221.13    |
|                                                                                               |          |                           |           | 1.05 × 10 <sup>-4</sup>  | 1.44 × 10 <sup>-1</sup> | 2.94 × 10 <sup>-8</sup> | 2.36 × 10 <sup>-3</sup> | 8.86 × 10 <sup>-1</sup> | 5.82 × 10 <sup>-3</sup> |           |

**Table S9**

The dependence table of critical temperatures (CTs) of 23 ethane and propane derivatives. The table shows the effect of successive addition of molecular descriptors as independent variables on the correlation parameters (R, adjusted R<sup>2</sup> and SE) in addition to the coefficients and p-values of the independent variables.

| Group IV (23 CT's)                                                                            |       |                        |       | <i>A</i>                   | <i>Γ<sub>s</sub></i>       | <i>P<sub>av</sub></i>      | <i>L<sub>av</sub></i>      | <i>Γ<sub>m</sub></i>       | <i>σ<sub>r,ep</sub></i>    | Intercept |
|-----------------------------------------------------------------------------------------------|-------|------------------------|-------|----------------------------|----------------------------|----------------------------|----------------------------|----------------------------|----------------------------|-----------|
| <i>Variable</i><br><i>s</i>                                                                   | R     | Adj.<br>R <sup>2</sup> | SE    | coeff                      | coeff                      | coeff                      | coeff                      | coeff                      | coeff                      |           |
|                                                                                               |       |                        |       | p-val                      | p-val                      | p-val                      | p-val                      | p-val                      | p-val                      |           |
| <i>A</i>                                                                                      | 0.587 | 0.313                  | 75.19 | 3.67                       |                            |                            |                            |                            |                            | 92.81     |
| <i>A + Γ<sub>s</sub></i>                                                                      | 0.888 | 0.767                  | 43.83 | 1.68                       | 4.03 ×<br>10 <sup>-4</sup> |                            |                            |                            |                            | 182.32    |
| <i>A + Γ<sub>s</sub> + P<sub>av</sub></i>                                                     | 0.890 | 0.759                  | 44.51 | -30                        | 4.16 ×<br>10 <sup>-4</sup> | 23.97                      |                            |                            |                            | 225.55    |
| <i>A + Γ<sub>s</sub> + P<sub>av</sub> + L<sub>av</sub></i>                                    | 0.918 | 0.808                  | 39.79 | 0.11                       | 3.10 ×<br>10 <sup>-4</sup> | 49.20                      | -14.80                     |                            |                            | 336.37    |
| <i>A + Γ<sub>s</sub> + P<sub>av</sub> + L<sub>av</sub> + Γ<sub>m</sub></i>                    | 0.958 | 0.893                  | 29.68 | -4.65                      | 1.26 ×<br>10 <sup>-4</sup> | 126.39                     | -16.67                     | 6.32 ×<br>10 <sup>-2</sup> |                            | 336.49    |
| <i>A + Γ<sub>s</sub> + P<sub>av</sub> + L<sub>av</sub> + Γ<sub>m</sub> + σ<sub>r,ep</sub></i> | 0.958 | 0.886                  | 30.59 | -4.61                      | 1.28 ×<br>10 <sup>-4</sup> | 125.55                     | -16.61                     | 5.94 ×<br>10 <sup>-2</sup> | 1.39                       | 334.99    |
|                                                                                               |       |                        |       | 9.35 ×<br>10 <sup>-2</sup> | 1.21 ×<br>10 <sup>-1</sup> | 2.73 ×<br>10 <sup>-3</sup> | 3.35 ×<br>10 <sup>-3</sup> | 2.42 ×<br>10 <sup>-1</sup> | 9.34 ×<br>10 <sup>-1</sup> |           |

**Table S10**

The dependence table of normal freezing points (NFPs) of 39 mono-, di- and triatomic compounds. The table shows the effect of successive addition of molecular descriptors as independent variables on the correlation parameters (R, adjusted R<sup>2</sup> and SE) in addition to the coefficients and p-values of the independent variables.

| Group I (39 NFP's)                                                                                                                                      |       |                        |       | <i>A</i> | $\Gamma_s$            | <i>P<sub>av</sub></i> | <i>L<sub>av</sub></i> | $\Gamma_m$            | $\sigma_{r,ep}$ | <i>S</i> | <i>g</i> | Intercept |
|---------------------------------------------------------------------------------------------------------------------------------------------------------|-------|------------------------|-------|----------|-----------------------|-----------------------|-----------------------|-----------------------|-----------------|----------|----------|-----------|
| <i>Variable</i><br><i>s</i>                                                                                                                             | R     | Adj.<br>R <sup>2</sup> | SE    | coeff    | coeff                 | coeff                 | coeff                 | coeff                 | coeff           | coeff    | coeff    |           |
|                                                                                                                                                         |       |                        |       | p-val    | p-val                 | p-val                 | p-val                 | p-val                 | p-val           | p-val    | p-val    |           |
| <i>A</i>                                                                                                                                                | 0.603 | 0.347                  | 65.51 | 2.46     |                       |                       |                       |                       |                 |          |          | -2.80     |
| <i>A + <math>\Gamma_s</math></i>                                                                                                                        | 0.788 | 0.600                  | 51.24 | 2.04     | $2.78 \times 10^{-4}$ |                       |                       |                       |                 |          |          | -8.92     |
| <i>A + <math>\Gamma_s</math> + <math>P_{av}</math></i>                                                                                                  | 0.847 | 0.693                  | 44.93 | -2.50    | $3.38 \times 10^{-4}$ | 51.04                 |                       |                       |                 |          |          | 70.74     |
| <i>A + <math>\Gamma_s</math> + <math>P_{av}</math> + <math>L_{av}</math></i>                                                                            | 0.872 | 0.733                  | 41.90 | -4.54    | $3.46 \times 10^{-4}$ | 80.90                 | -4.65                 |                       |                 |          |          | 125.30    |
| <i>A + <math>\Gamma_s</math> + <math>P_{av}</math> + <math>L_{av}</math> + <math>\Gamma_m</math></i>                                                    | 0.896 | 0.773                  | 38.61 | -2.60    | $1.60 \times 10^{-4}$ | 61.37                 | -3.10                 | $2.61 \times 10^{-2}$ |                 |          |          | 58.22     |
| <i>A + <math>\Gamma_s</math> + <math>P_{av}</math> + <math>L_{av}</math> + <math>\Gamma_m</math> + <math>\sigma_{r,ep}</math></i>                       | 0.902 | 0.779                  | 38.10 | -3.32    | $1.45 \times 10^{-4}$ | 69.16                 | -3.76                 | $1.12 \times 10^{-2}$ | 10.21           |          |          | 68.43     |
| <i>A + <math>\Gamma_s</math> + <math>P_{av}</math> + <math>L_{av}</math> + <math>\Gamma_m</math> + <math>\sigma_{r,ep}</math> + <i>S</i></i>            | 0.922 | 0.816                  | 34.73 | -3.86    | $1.27 \times 10^{-4}$ | 76.42                 | -3.39                 | $1.11 \times 10^{-2}$ | 12.68           | 54.49    |          | 59.08     |
| <i>A + <math>\Gamma_s</math> + <math>P_{av}</math> + <math>L_{av}</math> + <math>\Gamma_m</math> + <math>\sigma_{r,ep}</math> + <i>S</i> + <i>g</i></i> | 0.923 | 0.812                  | 35.14 | -4.20    | $1.37 \times 10^{-4}$ | 80.21                 | -3.60                 | $1.23 \times 10^{-2}$ | 10.73           | 51.44    | 7.01     | 63.20     |

**Table S11**

The dependence table of normal freezing points (NFPs) of 28 tetratomic compounds. The table shows the effect of successive addition of molecular descriptors as independent variables on the correlation parameters (R, adjusted R<sup>2</sup> and SE) in addition to the coefficients and p-values of the independent variables.

| <b>Group II (28 NFP's)</b>                                                                                                                        |       |                     |       | <i>A</i>                | $\Gamma_s$              | <i>P<sub>av</sub></i>   | <i>L<sub>av</sub></i>   | $\Gamma_m$              | $\sigma_{r,ep}$         | <i>g'</i>               | Intercept |
|---------------------------------------------------------------------------------------------------------------------------------------------------|-------|---------------------|-------|-------------------------|-------------------------|-------------------------|-------------------------|-------------------------|-------------------------|-------------------------|-----------|
| <i>Variable</i>                                                                                                                                   | R     | Adj. R <sup>2</sup> | SE    | coeff                   |           |
| <i>s</i>                                                                                                                                          |       |                     |       | p-val                   |           |
| <i>A</i>                                                                                                                                          | 0.571 | 0.300               | 55.38 | 1.26                    |                         |                         |                         |                         |                         |                         | 73.88     |
|                                                                                                                                                   |       |                     |       | 1.51 × 10 <sup>-3</sup> |                         |                         |                         |                         |                         |                         |           |
| <i>A + <math>\Gamma_s</math></i>                                                                                                                  | 0.783 | 0.583               | 42.75 | 1.42                    | 1.80 × 10 <sup>-4</sup> |                         |                         |                         |                         |                         | 13.31     |
|                                                                                                                                                   |       |                     |       | 2.71 × 10 <sup>-5</sup> | 2.19 × 10 <sup>-4</sup> |                         |                         |                         |                         |                         |           |
| <i>A + <math>\Gamma_s</math> + <i>P<sub>av</sub></i></i>                                                                                          | 0.822 | 0.636               | 39.95 | -0.98                   | 2.13 × 10 <sup>-4</sup> | 26.49                   |                         |                         |                         |                         | 77.19     |
|                                                                                                                                                   |       |                     |       | 4.00 × 10 <sup>-1</sup> | 3.34 × 10 <sup>-5</sup> | 4.18 × 10 <sup>-2</sup> |                         |                         |                         |                         |           |
| <i>A + <math>\Gamma_s</math> + <i>P<sub>av</sub></i> + <i>L<sub>av</sub></i></i>                                                                  | 0.844 | 0.663               | 38.44 | -3.28                   | 2.23 × 10 <sup>-4</sup> | 61.31                   | -5.39                   |                         |                         |                         | 150.64    |
|                                                                                                                                                   |       |                     |       | 7.18 × 10 <sup>-2</sup> | 1.44 × 10 <sup>-5</sup> | 1.59 × 10 <sup>-2</sup> | 1.01 × 10 <sup>-1</sup> |                         |                         |                         |           |
| <i>A + <math>\Gamma_s</math> + <i>P<sub>av</sub></i> + <i>L<sub>av</sub></i> + <math>\Gamma_m</math></i>                                          | 0.850 | 0.659               | 38.66 | -2.17                   | 1.29 × 10 <sup>-4</sup> | 49.29                   | -3.41                   | 2.05 × 10 <sup>-2</sup> |                         |                         | 85.24     |
|                                                                                                                                                   |       |                     |       | 3.29 × 10 <sup>-1</sup> | 2.82 × 10 <sup>-1</sup> | 8.68 × 10 <sup>-2</sup> | 3.93 × 10 <sup>-1</sup> | 3.99 × 10 <sup>-1</sup> |                         |                         |           |
| <i>A + <math>\Gamma_s</math> + <i>P<sub>av</sub></i> + <i>L<sub>av</sub></i> + <math>\Gamma_m</math> + <math>\sigma_{r,ep}</math></i>             | 0.851 | 0.645               | 39.45 | -2.55                   | 1.47 × 10 <sup>-4</sup> | 53.48                   | -3.97                   | 2.00 × 10 <sup>-2</sup> | -2.86                   |                         | 110.29    |
|                                                                                                                                                   |       |                     |       | 3.14 × 10 <sup>-1</sup> | 2.71 × 10 <sup>-1</sup> | 9.45 × 10 <sup>-2</sup> | 3.67 × 10 <sup>-1</sup> | 4.23 × 10 <sup>-1</sup> | 7.31 × 10 <sup>-1</sup> |                         |           |
| <i>A + <math>\Gamma_s</math> + <i>P<sub>av</sub></i> + <i>L<sub>av</sub></i> + <math>\Gamma_m</math> + <math>\sigma_{r,ep}</math> + <i>g'</i></i> | 0.861 | 0.651               | 39.10 | -2.05                   | 1.44 × 10 <sup>-4</sup> | 44.71                   | -2.03                   | 2.54 × 10 <sup>-2</sup> | -6.31                   | -18.90                  | 124.36    |
|                                                                                                                                                   |       |                     |       | 4.20 × 10 <sup>-1</sup> | 2.76 × 10 <sup>-1</sup> | 1.67 × 10 <sup>-1</sup> | 6.61 × 10 <sup>-1</sup> | 3.16 × 10 <sup>-1</sup> | 4.75 × 10 <sup>-1</sup> | 2.54 × 10 <sup>-1</sup> |           |

**Table S12**

The dependence table of normal freezing points (NFPs) of 58 compounds (tetratomic compounds and some methane derivatives). The table shows the effect of successive addition of molecular descriptors as independent variables on the correlation parameters (R, adjusted R<sup>2</sup> and SE) in addition to the coefficients and p-values of the independent variables.

| <b>Group III (58 NFP's)</b>                                                                   |       |                     |       | <i>A</i>                 | $\Gamma_s$               | <i>P<sub>av</sub></i>   | <i>L<sub>av</sub></i>   | $\Gamma_m$              | $\sigma_{r,ep}$         | Intercept |
|-----------------------------------------------------------------------------------------------|-------|---------------------|-------|--------------------------|--------------------------|-------------------------|-------------------------|-------------------------|-------------------------|-----------|
| <i>Variable</i>                                                                               | R     | Adj. R <sup>2</sup> | SE    | coeff                    | coeff                    | coeff                   | coeff                   | coeff                   | coeff                   |           |
| <i>s</i>                                                                                      |       |                     |       | p-val                    | p-val                    | p-val                   | p-val                   | p-val                   | p-val                   |           |
| <i>A</i>                                                                                      | 0.786 | 0.610               | 38.48 | 1.61                     |                          |                         |                         |                         |                         | 1.24      |
|                                                                                               |       |                     |       | 2.84 × 10 <sup>-13</sup> |                          |                         |                         |                         |                         |           |
| <i>A + Γ<sub>s</sub></i>                                                                      | 0.857 | 0.725               | 32.35 | 1.76                     | 2.02 × 10 <sup>-4</sup>  |                         |                         |                         |                         | -54.46    |
|                                                                                               |       |                     |       | 4.01 × 10 <sup>-17</sup> | 8.13 × 10 <sup>-6</sup>  |                         |                         |                         |                         |           |
| <i>A + Γ<sub>s</sub> + P<sub>av</sub></i>                                                     | 0.885 | 0.770               | 29.55 | 0.03                     | 1.74 × 10 <sup>-4</sup>  | 20.53                   |                         |                         |                         | -5.50     |
|                                                                                               |       |                     |       | 9.49 × 10 <sup>-1</sup>  | 3.24 × 10 <sup>-5</sup>  | 1.08 × 10 <sup>-3</sup> |                         |                         |                         |           |
| <i>A + Γ<sub>s</sub> + P<sub>av</sub> + L<sub>av</sub></i>                                    | 0.908 | 0.810               | 26.84 | -2.23                    | 1.26 × 10 <sup>-4</sup>  | 50.71                   | -3.74                   |                         |                         | 98.45     |
|                                                                                               |       |                     |       | 7.08 × 10 <sup>-3</sup>  | 1.33 × 10 <sup>-3</sup>  | 6.39 × 10 <sup>-6</sup> | 8.80 × 10 <sup>-4</sup> |                         |                         |           |
| <i>A + Γ<sub>s</sub> + P<sub>av</sub> + L<sub>av</sub> + Γ<sub>m</sub></i>                    | 0.920 | 0.832               | 25.24 | -2.87                    | -2.32 × 10 <sup>-5</sup> | 61.93                   | -4.17                   | 3.78 × 10 <sup>-2</sup> |                         | 92.80     |
|                                                                                               |       |                     |       | 5.62 × 10 <sup>-4</sup>  | 7.16 × 10 <sup>-1</sup>  | 1.90 × 10 <sup>-7</sup> | 1.31 × 10 <sup>-4</sup> | 6.83 × 10 <sup>-3</sup> |                         |           |
| <i>A + Γ<sub>s</sub> + P<sub>av</sub> + L<sub>av</sub> + Γ<sub>m</sub> + σ<sub>r,ep</sub></i> | 0.925 | 0.839               | 24.74 | -3.17                    | -1.15 × 10 <sup>-6</sup> | 65.45                   | -4.60                   | 5.64 × 10 <sup>-2</sup> | -9.91                   | 113.18    |
|                                                                                               |       |                     |       | 1.80 × 10 <sup>-4</sup>  | 9.86 × 10 <sup>-1</sup>  | 5.78 × 10 <sup>-8</sup> | 3.72 × 10 <sup>-5</sup> | 1.54 × 10 <sup>-3</sup> | 8.35 × 10 <sup>-2</sup> |           |



**Table S13**

The dependence table of normal freezing points (NFPs) of 30 ethane and propane derivatives. The table shows the effect of successive addition of molecular descriptors as independent variables on the correlation parameters (R, adjusted R<sup>2</sup> and SE) in addition to the coefficients and p-values of the independent variables.

| <b>Group IV (30 NFP's)</b>                                                                    |       |                     |       | <i>A</i>                | <i>Γ<sub>s</sub></i>     | <i>P<sub>av</sub></i>   | <i>L<sub>av</sub></i>   | <i>Γ<sub>m</sub></i>    | <i>σ<sub>r,ep</sub></i> | Intercept |
|-----------------------------------------------------------------------------------------------|-------|---------------------|-------|-------------------------|--------------------------|-------------------------|-------------------------|-------------------------|-------------------------|-----------|
| <i>Variable s</i>                                                                             | R     | Adj. R <sup>2</sup> | SE    | coeff                   | coeff                    | coeff                   | coeff                   | coeff                   | coeff                   |           |
|                                                                                               |       |                     |       | p-val                   | p-val                    | p-val                   | p-val                   | p-val                   | p-val                   |           |
| <i>A</i>                                                                                      | 0.559 | 0.288               | 50.13 | 1.99                    |                          |                         |                         |                         |                         | -55.08    |
| <i>A + Γ<sub>s</sub></i>                                                                      | 0.634 | 0.358               | 47.59 | 1.37                    | 1.31 × 10 <sup>-4</sup>  |                         |                         |                         |                         | -29.78    |
| <i>A + Γ<sub>s</sub> + P<sub>av</sub></i>                                                     | 0.678 | 0.398               | 46.09 | -2.90                   | 1.67 × 10 <sup>-4</sup>  | 45.98                   |                         |                         |                         | 102.61    |
| <i>A + Γ<sub>s</sub> + P<sub>av</sub> + L<sub>av</sub></i>                                    | 0.864 | 0.705               | 32.24 | -1.85                   | 1.72 × 10 <sup>-5</sup>  | 84.15                   | -23.15                  |                         |                         | 238.50    |
| <i>A + Γ<sub>s</sub> + P<sub>av</sub> + L<sub>av</sub> + Γ<sub>m</sub></i>                    | 0.911 | 0.795               | 26.88 | -3.25                   | -9.66 × 10 <sup>-5</sup> | 109.01                  | -22.85                  | 4.27 × 10 <sup>-2</sup> |                         | 198.83    |
| <i>A + Γ<sub>s</sub> + P<sub>av</sub> + L<sub>av</sub> + Γ<sub>m</sub> + σ<sub>r,ep</sub></i> | 0.911 | 0.786               | 27.45 | -3.27                   | -9.82 × 10 <sup>-5</sup> | 109.57                  | -22.94                  | 4.71 × 10 <sup>-2</sup> | -1.66                   | 200.95    |
|                                                                                               |       |                     |       | 5.73 × 10 <sup>-2</sup> | 1.07 × 10 <sup>-1</sup>  | 9.76 × 10 <sup>-6</sup> | 3.35 × 10 <sup>-6</sup> | 1.84 × 10 <sup>-1</sup> | 8.93 × 10 <sup>-1</sup> |           |

## Supplementary Figures

Figure S1

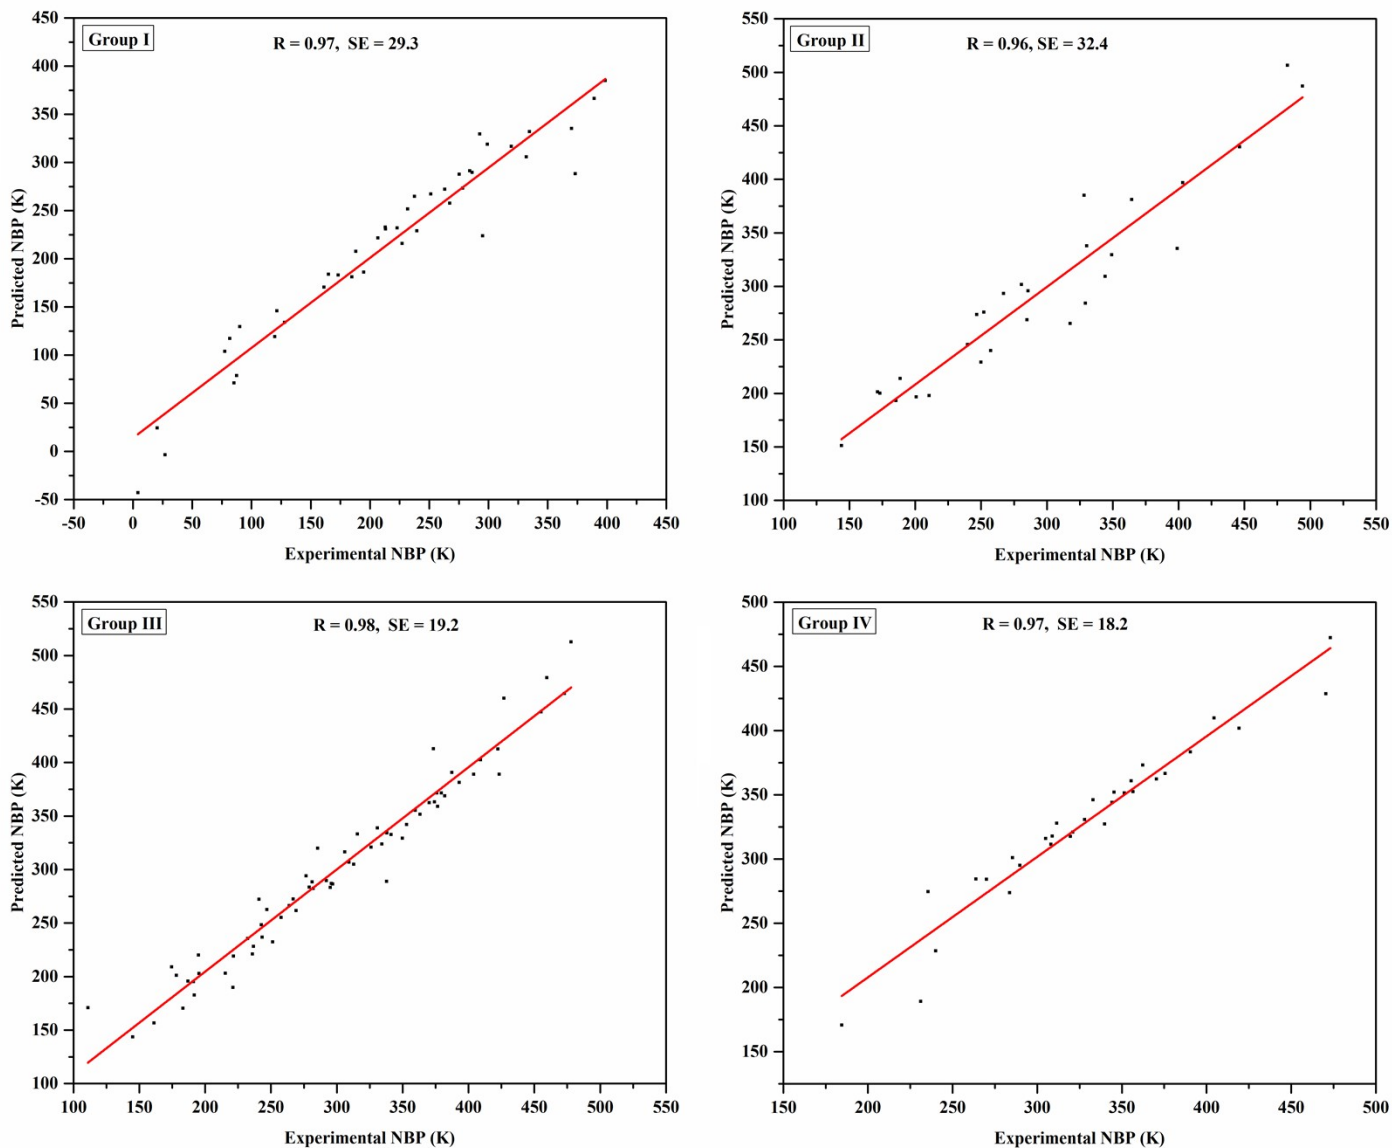

Figure S1: Experimental (X-axis) vs predicted (Y-axis) values of normal boiling points (NBPs) of Group I, II, III and IV compounds, where the full-variable relation is used, with the correlation coefficient (R) and the standard error (SE) depicted on the graphs

Figure S2

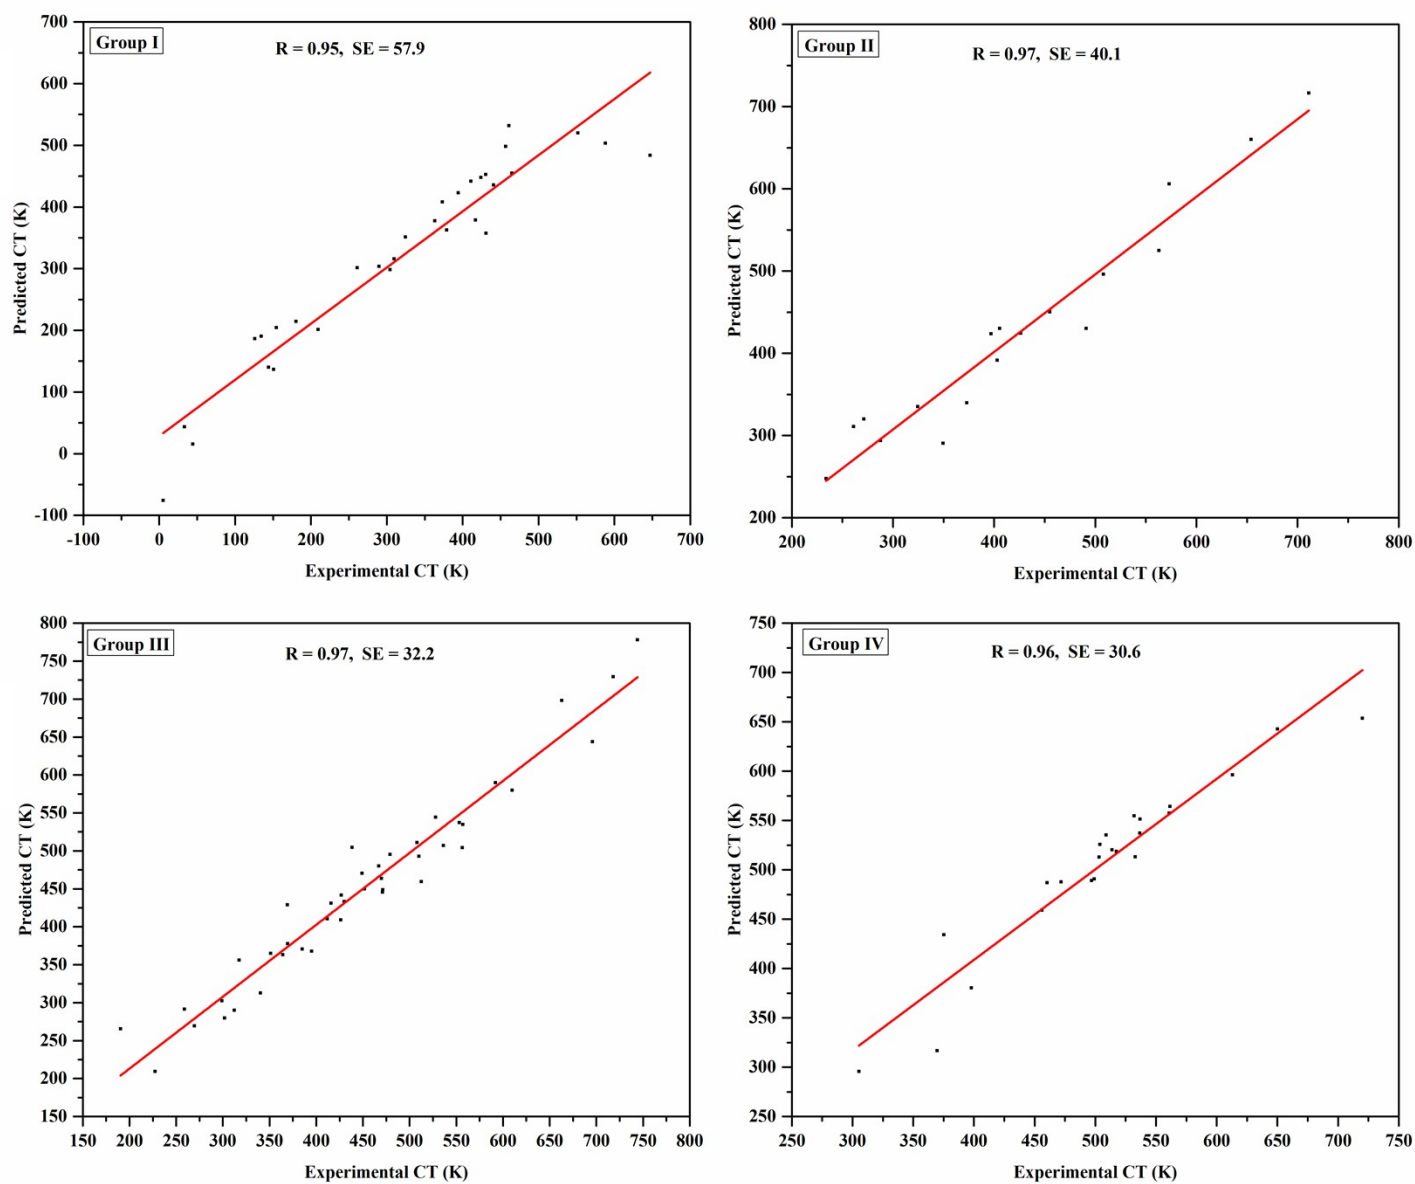

Figure S2: Experimental (X-axis) vs predicted (Y-axis) values of critical temperatures (CTs) of Group I, II, III and IV compounds, where the full-variable relation is used, with the correlation coefficient (R) and the standard error (SE) depicted on the graphs

Figure S3

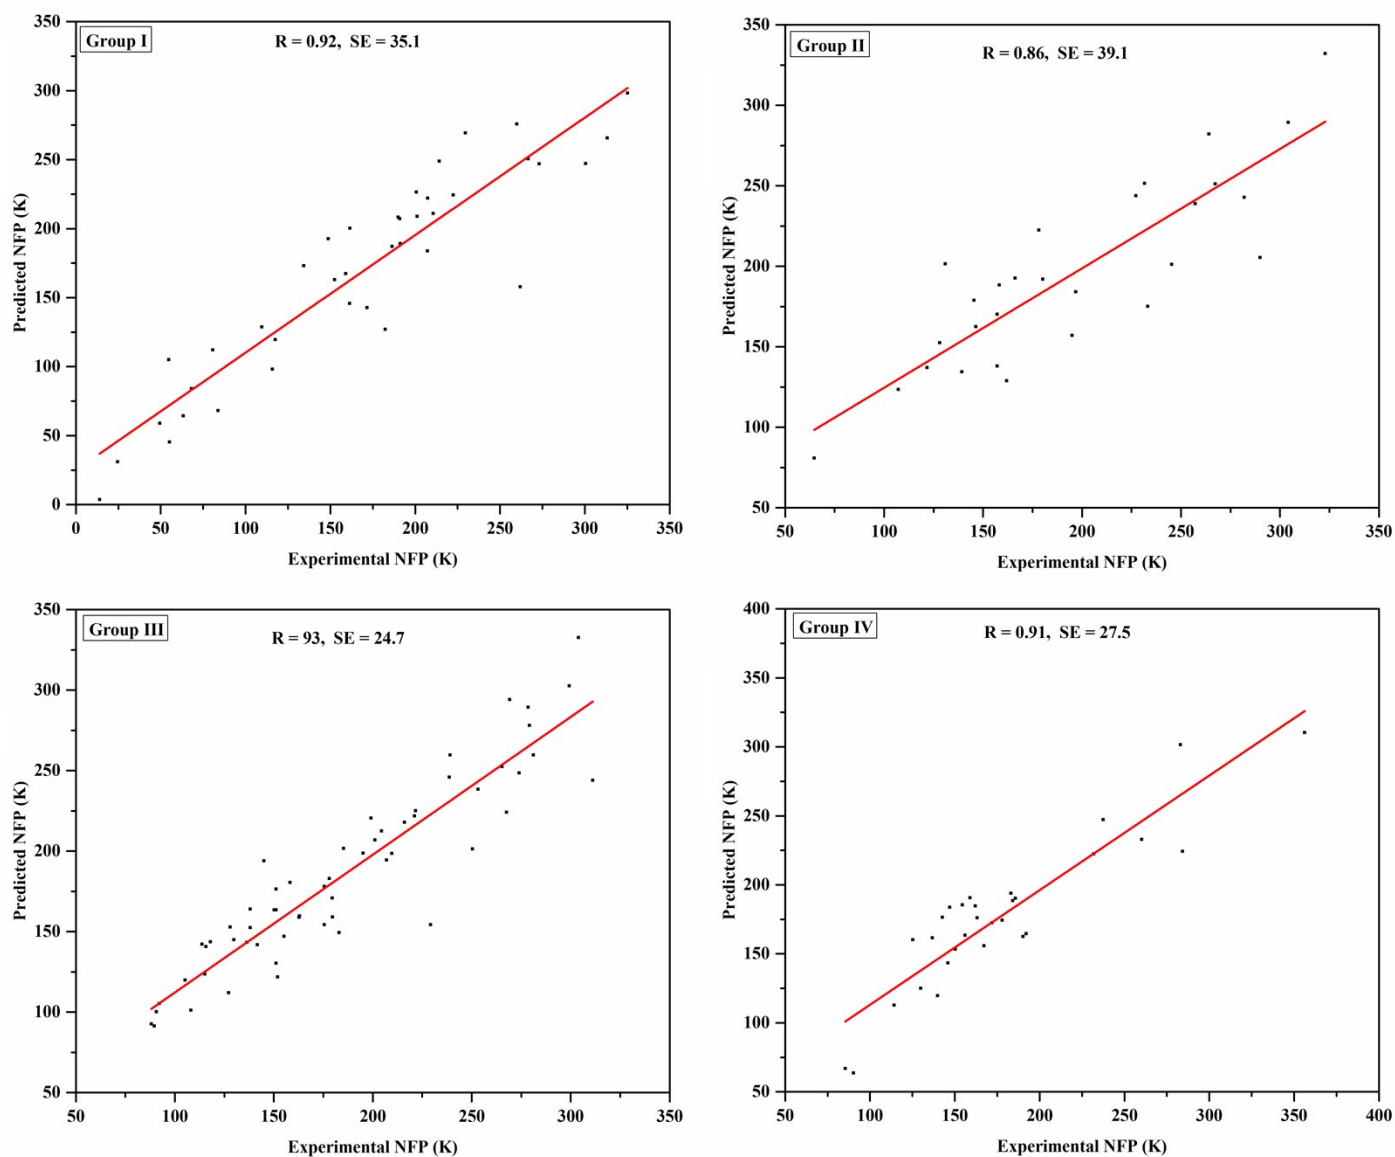

Figure S3: Experimental (X-axis) vs predicted (Y-axis) values of normal freezing points (NFPs) of Group I, II, III and IV compounds, where the full-variable relation is used, with the correlation coefficient (R) and the standard error (SE) depicted on the graphs

Figure S4

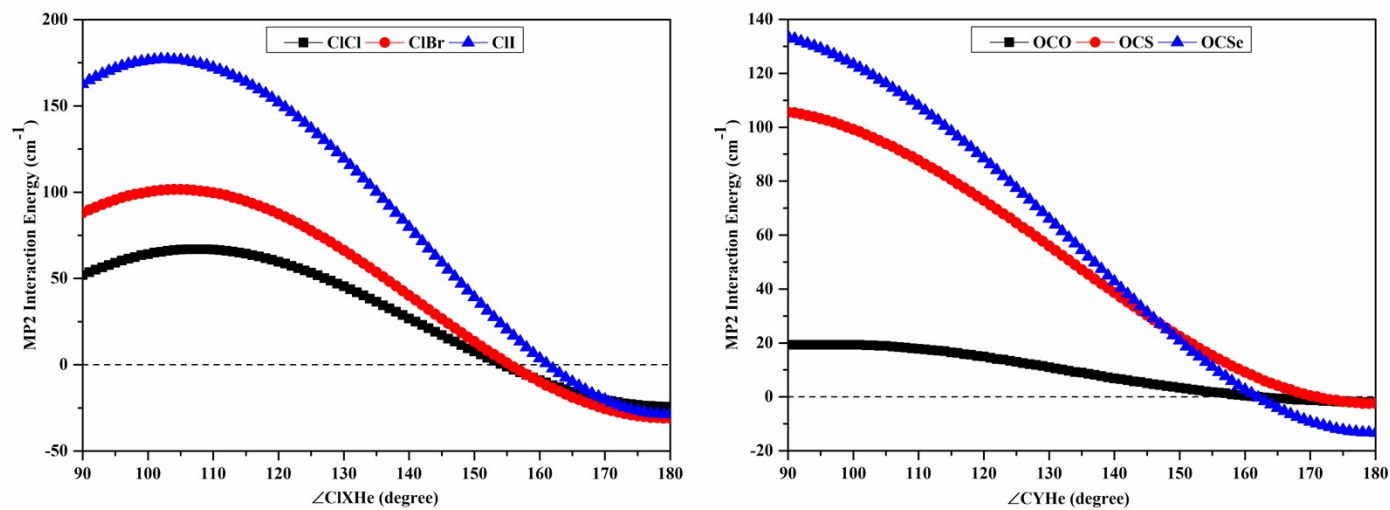

Figure S4: The interaction energies of the of CIX...He and OCY...He complexes (X = Cl, Br and I and Y = O, S and Se) calculated at MP2/aug-cc-pVDZ level of theory, where the  $\angle$ CIXHe and  $\angle$ CYHe angles increase from 90° to 180° and the X/Y...He distance is the sum of the VdW radii of the X/Y and He atoms

Figure S5

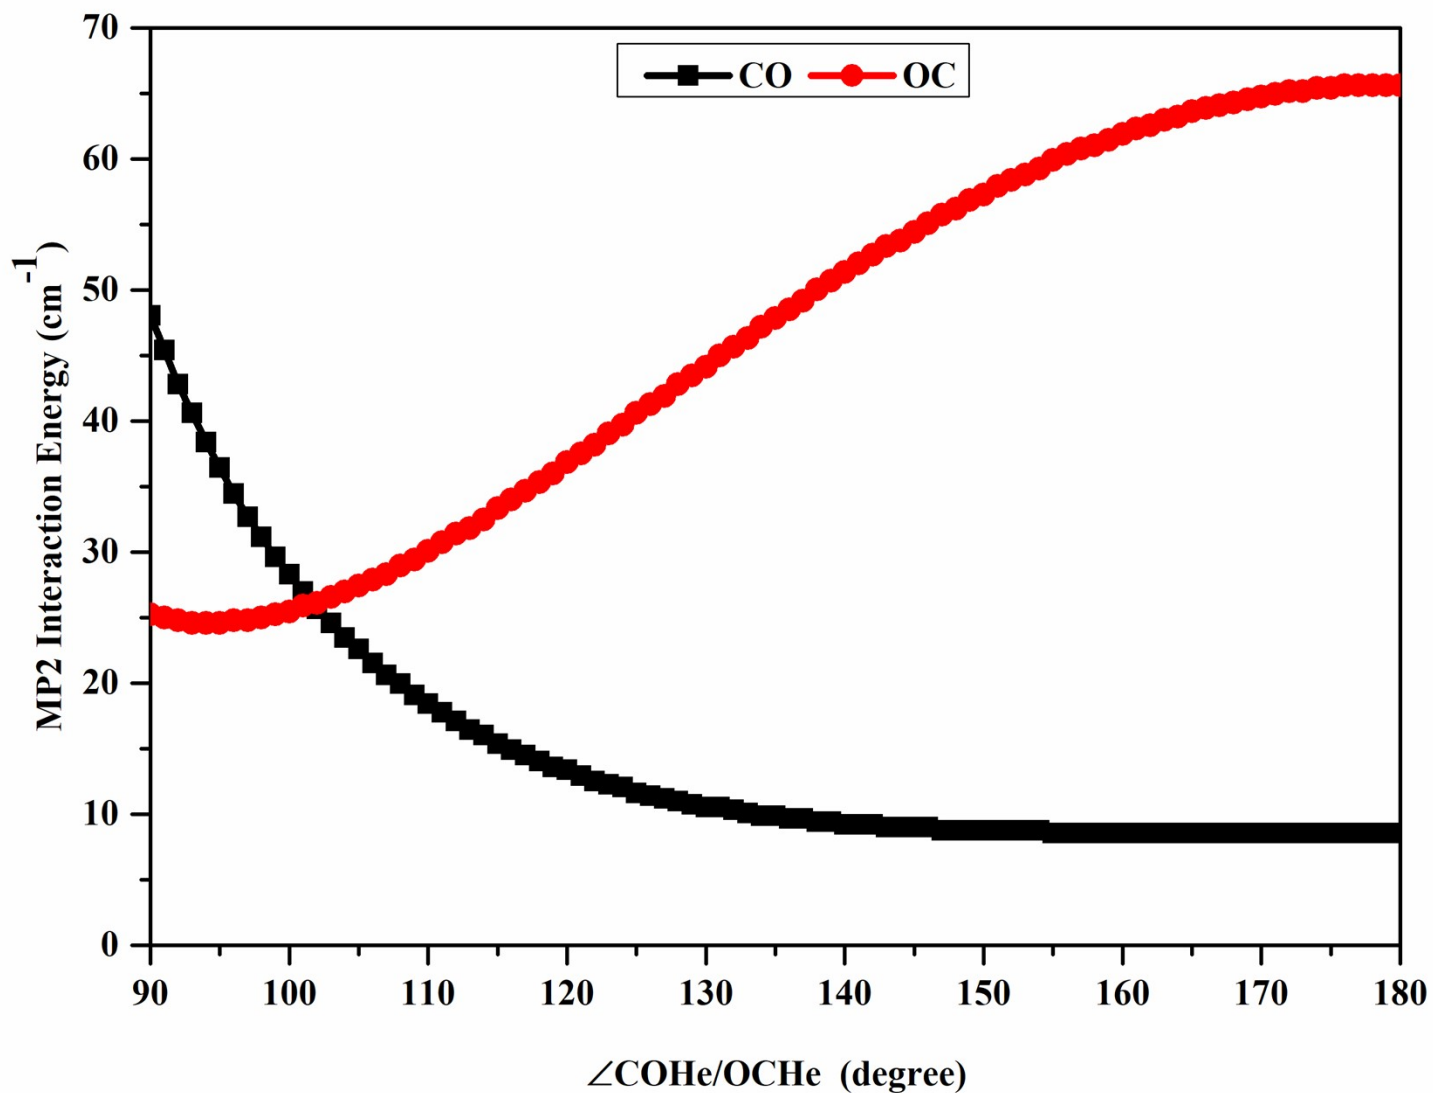

Figure S5: The interaction energies of the of  $\text{CO}\cdots\text{He}$  and  $\text{OC}\cdots\text{He}$  complexes calculated at MP2/aug-cc-pVDZ level of theory, where the  $\angle\text{COHe}$  and  $\angle\text{OHe}$  angles increase from  $90^\circ$  to  $180^\circ$  and the  $\text{C/O}\cdots\text{He}$  distance is the sum of the VdW radii of the C/O and He atoms

Figure S6

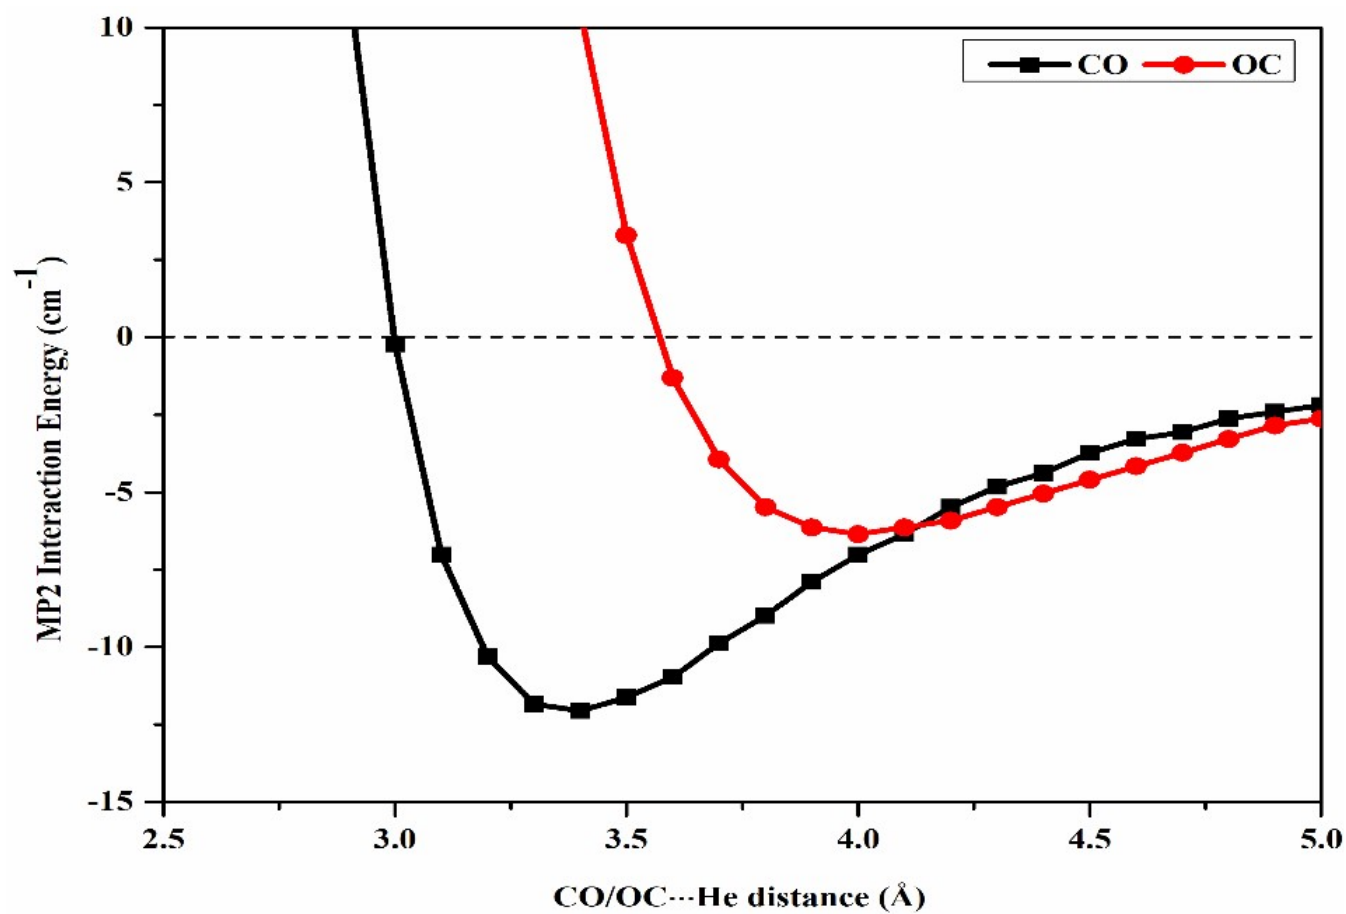

Figure S6: PES scan of the of CO/OC...He complexes calculated at MP2/aug-cc-pVDZ level of theory, where the  $\angle\text{COHe}$  and  $\angle\text{COHe} = 180^\circ$  and the CO/OC...He distance ranged from 2.5 to 5  $\text{Å}$  with a step size of 0.1  $\text{Å}$

## References

1. J. R. Rumble, ed., *CRC handbook of chemistry and physics*, CRC Press, Boca Raton, FL, 2017.
2. A. R. Katritzky, V. S. Lobanov and M. Karelson, *J. Chem. Inf. Comput. Sci.*, 1998, **38**, 28-41.
3. C. L. Yaws, in *Handbook of Chemical Compound Data for Process Safety*, ed. C. L. Yaws, Gulf Professional Publishing, Houston, 1997, DOI: <https://doi.org/10.1016/B978-88415381-8/50017-6>, pp. 1-26.
4. A. P. Kudchadker, S. A. Kudchadker, R. P. Shukla and P. R. Patnaik, *J. Phys. Chem. Ref. Data*, 1979, **8**, 499-517.
5. H. W. Xiang, *J. Phys. Chem. Ref. Data*, 2001, **30**, 1161-1197.
6. D. R. Stull, *Ind. Eng. Chem.*, 1947, **39**, 517-540.
7. D. L. Perry, *Handbook of inorganic compounds*, CRC press, Boca Raton, FL, 2016.
8. P. J. Linstrom and W. G. Mallard, *J. Chem. Eng. Data*, 2001, **46**, 1059-1063.
9. S. Kim, P. A. Thiessen, E. E. Bolton, J. Chen, G. Fu, A. Gindulyte, L. Han, J. He, S. He, B. A. Shoemaker, J. Wang, B. Yu, J. Zhang and S. H. Bryant, *Nucleic Acids Res.*, 2016, **44**, D1202-D1213.
10. J.-C. Bradley, A. Lang, A. Williams and E. Curtin, *Nature Precedings*, 2011, DOI: 10.1038/npre.2011.6229.1.
11. J. Dykij, J. Svoboda, R. C. Wilhoit, M. Frenkel and K. R. Hall, *Journal*, DOI: 10.1007/10680373\_12.
12. P. Dasgupta and S. Bhattacharjee, *Chem. Eng. Sci.*, 1993, **48**, 1535-1538.
13. J. Šima, *Foundations of Chemistry*, 2016, **18**, 67-79.
14. Carbon difluoride, in *Topics in Inorganic and General Chemistry*, eds. T. A. Ryan, C. Ryan, E. A. Seddon and K. R. Seddon, Pergamon, Oxford, 1996, vol. 24, pp. 545-664.
15. A. G. MacDiarmid, in *Advances in Inorganic Chemistry and Radiochemistry*, eds. H. J. Emeleus and A. G. Sharpe, Academic Press, 1961, vol. 3, pp. 207-256.
16. C. J. Hoffman and R. G. Neville, *Chem. Rev.*, 1962, **62**, 1-18.
17. C. L. Yaws and P. K. Narasimhan, in *Thermophysical Properties of Chemicals and Hydrocarbons*, ed. C. L. Yaws, William Andrew Publishing, Norwich, NY, 2009, DOI: <https://doi.org/10.1016/B978-81551596-8.50006-7>, pp. 1-95.
18. R. M. Stephenson, S. K. Malanowski and D. Ambrose, 1987.
19. T. Kaiho, in *Iodine Chemistry and Applications*, 2014, DOI: <https://doi.org/10.1002/9781118909911.ch2>, pp. 7-14.
20. T. G. Pearson and P. L. Robinson, *J. Chem. Soc. (Resumed)*, 1932, DOI: 10.1039/JR9320000652, 652-660.
21. L. J. Beckham, W. A. Fessler and M. A. Kise, *Chem. Rev.*, 1951, **48**, 319-396.
22. G. Hetherington and P. L. Robinson, *J. Chem. Soc. (Resumed)*, 1955, DOI: 10.1039/JR9550002230, 2230-2233.
23. H. S. Booth and C. F. Swinehart, *J. Am. Chem. Soc.*, 1932, **54**, 4750-4751.
24. W. F. Barber, C. F. Boynton and P. E. Gallagher, *J. Chem. Eng. Data*, 1964, **9**, 137-138.
25. P. Cao, J.-X. Duan and Q.-Y. Chen, *J. Chem. Soc., Chem. Commun.*, 1994, DOI: 10.1039/C39940000737, 737-738.
26. O. Ruff, *Berichte der deutschen chemischen Gesellschaft (A and B Series)*, 1936, **69**, 299-308.
27. K. L. Berry and J. M. Sturtevant, *J. Am. Chem. Soc.*, 1942, **64**, 1599-1600.
28. J. Hine and S. Ehrenson, *The Journal of Organic Chemistry*, 1956, **21**, 819-820.
29. J. J. Kaczur and D. W. Cawlfeld, in *Kirk-Othmer Encyclopedia of Chemical Technology*, 2000, DOI: <https://doi.org/10.1002/0471238961.0308121511010326.a01>.
30. A. F. O. Germann and Q. W. Taylor, *J. Am. Chem. Soc.*, 1926, **48**, 1154-1159.
31. R. L. Scott, *Mol. Phys.*, 1966, **11**, 399-401.
32. C. T. Ratcliffe, *The Preparation and Properties of Nitrosyl Halides and Perfluoroalkyl Sulfinyl Halides*, University of Idaho, 1968.
33. H. Gokce, 1991.
34. F. Kohler, H. J. R. Guedes, J. Revés and M. Nunes da Ponte, *J. Mol. Liq.*, 1995, **67**, 105-123.
35. Diiododifluoromethane, SDS No: 1100J20, July-2016, SynQuest Laboratories, Inc. Alachua, FL 32615 - USA.
36. Chlorine Trifluoride, <https://cameochemicals.noaa.gov/chemical/372>, June 1999, CAMEO Chemicals, Database of Hazardous Materials.
37. Nitric Oxide, SDS No: P-4632, November-2021, Linde, Inc; Danbury, CT 06810-6268, USA.
38. Dichlorosilane, SDS No: P-4587, June-2022, Linde, Inc; Danbury, CT 06810-6268, USA.
39. Boron Trifluoride, SDS No: 001006, April-2020, Airgas USA, LLC and its affiliates, Randor PA, USA.
40. Arsine, SDS No: P-4565, March-2021, Linde, Inc; Danbury, CT 06810-6268, USA.
